# Supplementary material
Source: ML conference proceedings conference paper supplement (https://proceedings.neurips.cc/paper_files/paper/2021/hash/a928731e103dfc64c0027fa84709689e-Abstract.html)
Supplement: Supplementary file 1 [file a928731e103dfc64c0027fa84709689e-Supplemental.pdf]

---

# On the Provable Generalization of Recurrent Neural Networks

---

**Lifu Wang**  
Beijing Jiaotong University  
Lifu\_Wang@bjtu.edu.cn

**Bo Shen\***  
Beijing Jiaotong University  
bshen@bjtu.edu.cn

**Bo Hu**  
Beijing Jiaotong University  
hubo2018@bjtu.edu.cn

**Xing Cao**  
Beijing Jiaotong University  
caoxing@bjtu.edu.cn

## Abstract

Recurrent Neural Network (RNN) is a fundamental structure in deep learning. Recently, some works study the training process of over-parameterized neural networks, and show that over-parameterized networks can learn functions in some notable concept classes with a provable generalization error bound. In this paper, we analyze the training and generalization for RNNs with random initialization, and provide the following improvements over recent works:

- (1) For a RNN with input sequence  $x = (X_1, X_2, \dots, X_L)$ , previous works study to learn functions that are summation of  $f(\beta_l^T X_l)$  and require normalized conditions that  $\|X_l\| \leq \epsilon$  with some very small  $\epsilon$  depending on the complexity of  $f$ . In this paper, using detailed analysis about the neural tangent kernel matrix, we prove a generalization error bound to learn such functions without normalized conditions and show that some notable concept classes are learnable with the numbers of iterations and samples scaling almost-polynomially in the input length  $L$ .
- (2) Moreover, we prove a novel result to learn  $N$ -variables functions of input sequence with the form  $f(\beta^T [X_{l_1}, \dots, X_{l_N}])$ , which do not belong to the “additive” concept class, i.e., the summation of function  $f(X_l)$ . And we show that when either  $N$  or  $l_0 = \max(l_1, \dots, l_N) - \min(l_1, \dots, l_N)$  is small,  $f(\beta^T [X_{l_1}, \dots, X_{l_N}])$  will be learnable with the number iterations and samples scaling almost-polynomially in the input length  $L$ .

## 1 Introduction

In Deep Learning, the recurrent neural network (RNN) is well-known as one of the most popular models to model sequential data and is widely used in practice for tasks in natural language processing (NLP). One of the characters of RNN is that it performs the same operation for all the input of the sequence.

Consider a input sequence  $x = (X_1, X_2, \dots, X_L)$ . A RNN with the form

$$h_l(x) = \phi(\mathbf{W}h_{l-1} + \mathbf{A}X_l), \quad (1)$$

---

\*Corresponding Author.

is trying to learn functions  $f_l(X_1, X_2, \dots, X_L)$  as

$$\begin{aligned} h_1(x) &= f_1(X_1) \\ h_2(x) &= f_2(X_1, X_2) \\ &\vdots \\ h_L(x) &= f_L(X_1, X_2, \dots, X_L) \end{aligned} \tag{2}$$

Due to the complex nonlinearity, the loss is generally non-convex, and it is very difficult to give a theoretical guarantee. Recently, there are some works Allen-Zhu et al. (2019b); Cao and Gu (2019); Allen-Zhu et al. (2019a); Du et al. (2019); Arora et al. (2019); Allen-Zhu et al. (2019c) trying to give a theoretical explanation that why gradient descent can allow an overparametrized network to attain arbitrarily low training error and ample generalization ability. These papers show that, under some assumptions, we have:

- *Multi-layer feed-forward networks Allen-Zhu et al. (2019b); Du et al. (2019) and recurrent neural networks Allen-Zhu et al. (2019c) with large hidden size can attain zero training error, regardless of whether the data is properly labeled or randomly labeled.*
- *For multi-layer feed-forward networks, functions with the form  $F^*(x) = \sum_{r=1}^C \phi_r(\beta_r^T X)$ ,  $X \in \mathbb{R}^d$ ,  $\beta_r \in \mathbb{R}^d$ ,  $\|\beta_r\| = 1$  are learnable i.e. fitting the training data with a provably small generalization error, if  $\phi$  is analytic and the “complexity” is low enough Allen-Zhu et al. (2019a); Arora et al. (2019); Cao and Gu (2019).*
- *The “complexity” of function  $\phi$  can be measured by a matrix derived from the NTK (Neural Tangent Kernel) of the network Arora et al. (2019); Cao and Gu (2019).*
- *For recurrent neural networks Allen-Zhu and Li (2019a), if the input sequence is normalized, i.e.,  $x = (X_1, X_2, \dots, X_L)$ ,  $\|X_1\| = 1$ ,  $\|X_l\| = \epsilon$  with  $\epsilon$  very small, functions with the form  $F^*(x) = \sum_{l=1}^L \sum_{r=1}^{C_l} \phi_{l,r}(\beta_{l,r}^T X_l)$  are learnable, where  $m$  is the size of matrix  $\mathbf{W}$ , and  $\mathcal{C} = \sum_{i=0}^{\infty} a_i R^i$  is a series representing the complexity of learnable functions.*

These works show the provable learning ability of deep learning. But there are still some important issues that were not addressed.

- Firstly, for RNNs, the method in Allen-Zhu and Li (2019a) requires a normalized condition for  $\mathbf{A}$  and  $X_l$  in (1) that  $\|\mathbf{A}X_l\| \leq \epsilon_x$  for all  $l \leq L$  and shows that for a function  $F^*(x)$  with the complexity  $\mathcal{C}$ , it is learnable with error  $O(\epsilon_x^{1/3} \mathcal{C})$ . Thus  $\|X_l\|$  (or equally,  $\|\mathbf{A}\|$ ) should be very small and the scale is dependent on the complexity of functions. The dependence of  $\|\mathbf{A}X_l\|$  on  $\mathcal{C}$  makes the results unrealistic in practice since generally the norm of input will not be so small.
- Secondly, the result in Allen-Zhu and Li (2019a) shows that RNNs can learn functions which are the summation of functions like  $\psi(\beta_l^T X_l)$ . But this is only a linear combination of the functions of the input at different positions and does not consider the nonlinear interaction of the inputs. One may ask, since  $h_L(x)$  is a function of  $\{X_1, X_2, \dots, X_L\}$ , is it possible to go beyond and learn more complex functions?

In order to study these problems, we consider the binary classification problem: for every input  $x_i$ , the label (+1 or -1) of  $x_i$  can be expressed by the sign of a target function  $F^*(x_i)$ . We consider Elman recurrent neural networks with ReLU activation

$$\begin{aligned} h_l(x) &= \phi(\mathbf{W}h_{l-1} + \mathbf{A}X_l) \\ f(\mathbf{W}, x) &= \mathbf{B}^T h_L(x) \in \mathbb{R}. \\ x &= (X_1, X_2, \dots, X_L), X_l \in \mathbb{R}^d, \mathbf{W} \in \mathbb{R}^{m \times m}, \\ \mathbf{A} &\in \mathbb{R}^{m \times d}, \mathbf{B} \in \mathbb{R}^m, \phi(x) = \max(x, 0) \end{aligned} \tag{3}$$

to learn two types of target functions:

- Additive Concept Class:

$$F^*(x) = \sum_{l=1}^L \sum_{r=1}^{\infty} \psi_{l,r}(\beta_{l,r}^T X_l / \|X_l\|),$$

$$\psi_{l,r}(x) = \sum_{i=0}^{\infty} c_i x^i,$$
(4)

- N-variables Concept Class:

$$F^*(x) = \sum_r \psi_r(\langle \beta_r, [X_{l_1}, \dots, X_{l_N}] \rangle),$$

$$\psi_r(x) = \sum_{i=0}^{\infty} c_i x^i.$$
(5)

For these two types of function, we study the following questions:

- Can RNN learn additive concept class functions (4) without the normalized condition with **reasonable complexity on the sequence size  $L$** ?
- Can RNN learn functions in N-variables Concept Class (5) which can not be written as the summation of  $f(X_l)$  with **reasonable complexity on  $N$  and  $L$** ?

**Our Result.** We answer the two questions and give a provable generalization error bound. Our results are stated as follows:

**Theorem 1 (Informal)** *For a function  $F^*(X_1, X_2, \dots, X_L)$  with the form as in (4) or (5), there is a power series named the complexity  $\mathcal{C}(F^*)$  dependent on the Taylor expansion coefficient in (4) and (5). For (4),  $\mathcal{C}(F^*)$  is almost-polynomial in  $L$ . For (5), when  $N$  or  $l_0 = \max(l_1, \dots, l_N) - \min(l_1, \dots, l_N)$  is small,  $\mathcal{C}(F^*)$  is almost-polynomial in  $L$ . Under this definition of complexity  $\mathcal{C}(F^*)$ ,  $F^*$  is learnable using RNN with  $m$  hidden nodes and ReLU activation in (3) in  $\mathcal{O}(\mathcal{C}(F^*)^2)$  steps with  $\mathcal{O}(\mathcal{C}(F^*)^2)$  samples if  $m \geq \text{poly}(L, \mathcal{C}(F^*))$ .*

**Contribution.** We summarize the contributions as follows:

- In this paper, we prove that RNN without normalized condition can efficiently learn some notable concept classes with **both time and sample complexity scaling almost polynomially in the input length  $L$** .
- Our results go beyond the “additive” concept class. We prove a novel result that RNN can learn more complex function of the input such as N-variables concept class functions. And “long range correlation functions” with small  $N$  (e.g.  $N = 2$ ,  $f(\beta^T [X_l, X_{l+l_0}])$ ) are learnable with **complexity scaling almost polynomially in the input length  $L$  and correlation distance  $l_0$** .
- Technically, we study the “backward correlation” of RNN network. In RNN case, using a crucial observation on the degeneracy of deep network, we show that the “**backward correlation**”  $\frac{1}{m} \langle \text{Back}_l(x_i), \text{Back}_l(x_j) \rangle$  will decay polynomially rather than exponentially in input length  $L$ . This shows the complexity of learning RNN with ReLU activation function is polynomial in the size of input sequence  $L$ .

**Notions.** For two matrices  $A, B \in \mathbb{R}^{m \times n}$ , we define  $\langle A, B \rangle = \text{Tr}(A^T B)$ . We define the asymptotic notations  $\mathcal{O}(\cdot), \Omega(\cdot), \text{poly}(\cdot)$  as follows.  $a_n, b_n$  are two sequences.  $a_n = \mathcal{O}(b_n)$  if  $\limsup_{n \rightarrow \infty} |a_n/b_n| < \infty$ ,  $a_n = \Omega(b_n)$  if  $\liminf_{n \rightarrow \infty} |a_n/b_n| > 0$ ,  $a_n = \text{poly}(b_n)$  if there is  $k \in \mathbb{N}$  that  $a_n = \mathcal{O}((b_n)^k)$ .  $\tilde{\mathcal{O}}(\cdot), \tilde{\Omega}(\cdot), \widetilde{\text{poly}}(\cdot)$  are notions which hide the logarithmic factors in  $\mathcal{O}(\cdot), \Omega(\cdot), \text{poly}(\cdot)$ .  $\|\cdot\|$  and  $\|\cdot\|_2$  denote the 2-norm of matrices.  $\|\cdot\|_1$  denote the 1-norm.  $\|\cdot\|_F$  is the Frobenius-norm.  $\|\cdot\|_0$  is the number of non-zero entries.

For elements  $A_{i,j}, B_{i,j}$  of symmetric matrix  $A, B$ . We abuse the notion  $A_{i,j} \succeq B_{i,j}$  to denote  $A \succeq B$ , i.e.  $A - B$  is a positive semidefinite matrix.

## 2 Preliminaries

### 2.1 Function Complexity

For a analytic function  $\psi(z)$ , we can write it as  $\psi(z) = c_0 + \sum_{i=1}^{\infty} c_i z^i$ . We define the following notion to measure the complexity to learn such functions.

$$\mathcal{C}(\psi, R) = 1 + \sum_{i=1}^{\infty} i \cdot |c_i| R^i. \quad (6)$$

$$\mathcal{C}_N(\psi, R) = 1 + \sum_{i=1}^{\infty} L^{1.5N} C_1^N \cdot \sqrt{C_{N,i}} \cdot (i/N)^N \cdot |c_i| R^i \quad (7)$$

where  $C_1 > 100$  is a large absolute constant and  $C_{N,i}$  is the largest combination number  $\frac{i!}{n_1! n_2! \dots n_N!}$  for  $n_1, n_2, \dots, n_N > 0, n_1 + n_2 + \dots + n_N = i$ ,

**Example 2.1** *Arora et al. (2019)* Consider  $\psi(z) = \arctan(z/2)$ . Then

$$\psi(z) = \sum_{i=1}^{\infty} \frac{(-1)^{i-1} 2^{1-2i}}{2i-1} z^{2i-1} \quad (8)$$

In this case,

$$\mathcal{C}(\psi, 1) = 1 + \sum_{i=1}^{\infty} i \cdot |c_i| \leq 1 + \sum_{i=1}^{\infty} 2^{1-2i} \leq \mathcal{O}(1).$$

**Example 2.2** In the case  $N = 2$ ,  $C_{2,i} = i$ ,  $(i/2)^2 \leq i^2$ .  $\psi(z) = \exp(z)$

$$\mathcal{C}_2(\psi, 1) \leq 1 + \sum_{i=1}^{\infty} L^3 C_1^2 \pi i^{2.5} / i! \leq \mathcal{O}(1)$$

### 2.2 Concept Class

For the input sequence  $\{X_l\}$ , we assume  $C_{\min} \leq \|X_l\| \leq C_{\max}$ , for all  $1 \leq l \leq L$  and  $C_{\max}/C_{\min} \sim C_0$ . Under this condition, we consider two types of target functions with the following form:

**Additive Concept Class.**

$$F^*(x) = \sum_{l=1}^L \sum_{r=1}^{C_l} \psi_{l,r}(\beta_{l,r}^T X_l / \|X_l\|). \quad (9)$$

Here for all  $l, r$ ,  $\psi_{l,r}$  is analytic and  $\|\beta_{l,r}\|_2 \leq 1$ .

We define

$$\mathcal{C}(F^*) = L^{3.5} \sum_{l=1}^L \sum_{r=1}^{C_l} \mathcal{C}(\psi_{l,r}, C_0 \sqrt{L}), \quad (10)$$

to be the complexity of the target function.

**Remark 2.1** If we consider function  $\psi(\beta^T X_l)$  and  $\|X_l\| = 1$  for all  $l$ , the above complexity will become  $\mathcal{C}(\psi, \mathcal{O}(\sqrt{L}))$ . This is similar with that in Allen-Zhu and Li (2019a) but this complexity requirement is much weaker than that in Allen-Zhu and Li (2019a). For example, the complexity of  $\arctan(z/2)$  in Allen-Zhu and Li (2019a) is not finite, as shown in Arora et al. (2019).

**N-variables Concept Class.**

$$F^*(x) = \sum_r \psi_r(\langle \beta_r, [X_{l_1}, \dots, X_{l_N}] \rangle / \sqrt{N} \max \|X_{l_n}\|). \quad (11)$$

For all  $r$ ,  $\psi_{l,a,r}(x, y)$  is an analytic function  $\psi_r(x) = c_0 + \sum_{i=1}^{\infty} c_i x^i$ .  $\beta_r \in \mathbb{R}^{dN}$ ,  $\|\beta_r\|_2 \leq 1$ . Let  $l_0 = \max(l_1, \dots, l_N) - \min(l_1, \dots, l_N)$ . We define

$$\mathcal{C}(F^*) = \min(L^2 \mathcal{C}_N(\psi_r, C_0 \sqrt{L}), L^{3.5} \mathcal{C}(\psi_r, 2^{l_0} C_0 \sqrt{L})). \quad (12)$$

**Remark 2.2** The complexity  $\sum_r \mathcal{C}_N(\psi_r, C_0\sqrt{L})$  and  $\sum_r \mathcal{C}(\psi_r, 2^{l_0}C_0\sqrt{L})$  are exponential in  $N$  and  $l_0$  respectively. And  $\mathcal{C}(F^*)$  is less or equal than both. Thus if either  $l_0$  or  $N$  is small,  $\mathcal{C}(F^*)$  will be polynomial in  $L$ . Especially when  $N$  is small (e.g.  $N=2$ ), even if  $l_0 = L - 1$ , functions with the form  $f(\beta^T[X_l, X_{l+l_0}])$  are still learnable with a low complexity.

### 2.3 Results on Positive Definite Matrices and Functions

We say a function  $\phi(\cdot, \cdot) : \mathbb{R}^d \times \mathbb{R}^d \rightarrow \mathbb{R}$  is positive definite if for all  $n \in \mathbb{N}$ , any  $\{x_1, \dots, x_n\} \subseteq \mathbb{R}^d$ ,  $\{c_1, \dots, c_n\} \subseteq \mathbb{R}$ ,

$$\sum_{i,j} c_i c_j \phi(x_i, x_j) \geq 0. \quad (13)$$

The following basic properties in chapter 3 of BergJens et al. (1984) are very useful in our proof.

**Proposition 2.1** If  $\phi(\cdot, \cdot)$  is positive definite function, let matrix  $\mathbf{M} \in \mathbb{R}^{n \times n}$ ,  $\{x_1, \dots, x_n\} \subseteq \mathbb{R}^d$ , and  $M_{i,j} = \phi(x_i, x_j)$ . Then  $\mathbf{M}$  is a semi-positive definite matrix.

**Proposition 2.2** If  $\phi_1(\cdot, \cdot)$  and  $\phi_2(\cdot, \cdot)$  are positive definite,  $\phi(x_i, x_j) = \phi_1(x_i, x_j) \cdot \phi_2(x_i, x_j)$  is also a positive definite function.

**Proposition 2.3** Let  $\phi(\cdot, \cdot)$  be a positive definite function, and  $\psi(x) = \sum_{i=0}^{\infty} c_i x^i$ ,  $c_i \geq 0$ . Then  $\psi(\phi(\cdot, \cdot))$  is also a positive definite function.

For a positive definite matrix  $\mathbf{M} \in \mathbb{R}^{n \times n}$ , there is a result in Arora et al. (2019),

**Proposition 2.4** (Section E of Arora et al. (2019).) Let  $\mathbf{X} = (x_1, \dots, x_n) \in \mathbb{R}^{d \times n}$  and  $\mathbf{K}_p \in \mathbb{R}^{n \times n}$  is a matrix with  $(K_p)_{i,j} = (x_i^T x_j)^p$ . Suppose there is  $\alpha > 0$ , such that  $\mathbf{M} \succeq \alpha^2 \mathbf{K}_p$ . Let  $y = ((\beta^T x_1)^p, \dots, (\beta^T x_n)^p) \in \mathbb{R}^n$ . We have  $\sqrt{y^T (\mathbf{M})^{-1} y} \leq \|\beta\|_2^p / \alpha$ .

## 3 Main Results

Assume there is an unknown data set  $\mathcal{D} = \{x, y\}$ . The inputs have the form  $x = (X_1, X_2, \dots, X_L) \in (\mathbb{R}^d)^L$ .  $\|X_l\| \leq \mathcal{O}(1)$  for all  $1 \leq l \leq L$ . For every input  $x_i$ , there is a label  $y_i = \pm 1$ .

The neural network with input  $x$  is

$$\begin{aligned} h_0(x) &= \phi(\mathbf{M}_0), \\ h_l(x) &= \phi(\mathbf{W}h_{l-1} + \mathbf{A}X_l), \\ f(\mathbf{W}, x) &= \mathbf{B}^T h_L(x). \end{aligned} \quad (14)$$

Here  $\mathbf{W} \in \mathbb{R}^{m \times m}$ ,  $\mathbf{A} \in \mathbb{R}^{m \times d}$ ,  $\mathbf{B}, \mathbf{M}_0 \in \mathbb{R}^m$ . The entries of  $\mathbf{M}_0$ ,  $\mathbf{W}$  and  $\mathbf{A}$  are respectively i.i.d. generated from  $N(0, \frac{2}{m})$ ,  $N(0, \frac{2}{m})$  and  $N(0, \frac{2}{L^3 \cdot m})$ . The entries of  $\mathbf{B}$  are i.i.d. generated from  $N(0, \frac{1}{m})$ .

The goal of learning RNN is to minimize the population loss:

$$L_{\mathcal{D}}(\mathbf{W}) = \mathbb{E}_{(x,y) \sim \mathcal{D}} \ell(y \cdot f(\mathbf{W}, x)), \quad (15)$$

by optimizing the empirical loss

$$L_S(\mathbf{W}) = \frac{1}{n} \sum_{i=1}^n \ell(y_i \cdot f(\mathbf{W}, x_i)), \quad (16)$$

using SGD. Here  $\ell(x) = \log(1 + \exp(-x))$  is the cross-entropy loss. Consider the SGD algorithm on this RNN. Let the complexity  $\mathcal{C}^*$  of  $F^*(\cdot)$  be defined in (10) and (12). The 0-1 error for  $\mathcal{D}$  is  $L_{\mathcal{D}}^{0-1}(\mathbf{W}) = \mathbb{E}_{(x,y) \sim \mathcal{D}} \mathbb{1}\{y \cdot f(\mathbf{W}, x) < 0\}$ . We have:

**Theorem 2** Assume there is  $\delta \in (0, e^{-1}]$ . Supposing for  $\mathcal{D} = \{x_i, y_i\}$ , there is a function  $F^*$  belonging to the concept class (9) or (11) such that  $y_i \cdot F^*(x_i) \geq 1$  for all  $i$ . Let  $\mathbf{W}^k$  be the output of

---

**Algorithm 1:** Training RNN with SGD

---

**Input:** Data set  $\mathcal{D}$ , learning rate  $\eta$ .

The entries of  $\mathbf{W}^0$ ,  $\mathbf{A}$  are i.i.d. generated from  $N(0, \frac{2}{m})$ . The entries of  $\mathbf{B}$  are i.i.d. generated from  $N(0, \frac{1}{m})$ .

**for**  $t = 1, 2, 3 \dots n$  **do**

    Randomly sample  $(x_t, y_t)$  from the data set  $\mathcal{D}$ .

$\mathbf{W}^t = \mathbf{W}^{t-1} - \eta \nabla_{\mathbf{W}^{t-1}} \ell(y_t \cdot f(\mathbf{W}^{t-1}, x_t))$ .

**end**

---

*Algorithm 1. There is a parameter  $m^*(n, \delta, L, \mathcal{C}^*) = \text{poly}(n, \delta^{-1}, L, \mathcal{C}^*)$  such that, with probability at least  $1 - \delta$ , if  $m > m^*(n, \delta, L)$ , there exists parameter  $\eta = \mathcal{O}(1/m)$  that satisfies*

$$\frac{1}{n} \sum_{k=1}^n L_{\mathcal{D}}^{0-1}(\mathbf{W}^k) \leq \tilde{\mathcal{O}}\left[\frac{(\mathcal{C}^*)^2}{n}\right] + \mathcal{O}\left(\frac{\log(1/\delta)}{n}\right). \quad (17)$$

**Remark 3.1** This theorem induces that, to achieve **population 0 – 1 error** (rather than empirical loss) being less than  $\epsilon$ , it is enough to train the network using Algorithm 1 with  $\tilde{\Omega}((L \cdot \mathcal{C}^*)^2/\epsilon)$  steps. As defined in section 2.1 and 2.2, when  $N$  is small, for the two types of concept class,  $(\mathcal{C}^*)^2$  is almost-polynomial in input length  $L$ . Thus they can be learned effectively.

**Remark 3.2** This theorem can also be generalized to “sequence labeling” loss such as  $\frac{1}{n} \sum_{i=1}^n \sum_{l=1}^L \ell(y_i \cdot f_l(\mathbf{W}, x_i))$  with  $f_l(\mathbf{W}, x) = \mathbf{B}^T h_l(x)$ . This is because the matrix

$$H_{i,j}^l = \frac{1}{m} \langle \nabla f_l(\mathbf{W}, x_i), \nabla f_l(\mathbf{W}, x_j) \rangle$$

with different  $l$  are almost “orthogonal” by a similar argument to (26) in Theorem 6. Then RNN can learn a function  $f_l = \text{sign}(F_l^*(x))$  with  $F_l^*(x)$  belonging to functions in section 2.2. See Remark G.1 in the supplementary materials.

## 4 Sketch Proof of the Main Theorem

The first step to prove the main theorem 2 is the following generalization of Corollary 3.10 in Cao and Gu (2019).

**Theorem 3** Under the condition of Theorem 2, let  $n$  samples in the training set be  $\{x_i, y_i\}_{i=1}^n$ .  $\tilde{\mathbf{y}} = [F^*(x_1), F^*(x_2), \dots, F^*(x_n)]^T$ . Let  $\mathbf{H}$  be a matrix with  $H_{i,j} = \frac{1}{m} \langle \nabla_{\tilde{\mathbf{W}}} f(\tilde{\mathbf{W}}, x_i), \nabla_{\tilde{\mathbf{W}}} f(\tilde{\mathbf{W}}, x_j) \rangle$ . The entries of  $\tilde{\mathbf{W}}$  are i.i.d. generated from  $N(0, \frac{2}{m})$ . If there is a matrix  $\mathbf{H}^\infty \in \mathbb{R}^{n \times n}$  satisfying

$$\mathbf{H} + \epsilon^T \epsilon \succeq \mathbf{H}^\infty \text{ with } \|\epsilon\|_F \leq 0.01/\mathcal{O}(\mathcal{C}^*), \quad (18)$$

and  $\sqrt{\tilde{\mathbf{y}}^T (\mathbf{H}^\infty)^{-1} \tilde{\mathbf{y}}} \leq \mathcal{O}(\mathcal{C}^*)$ , there exists  $m^*(n, \delta^{-1}, L, \mathcal{C}^*) = \text{poly}(n, \delta^{-1}, L, \mathcal{C}^*)$  such that, with probability at least  $1 - \delta$ , if  $m > m^*$ ,

$$\frac{1}{n} \sum_{k=1}^n L_{\mathcal{D}}^{0-1}(\mathbf{W}^k) \leq \tilde{\mathcal{O}}\left[\frac{\tilde{\mathbf{y}}^T (\mathbf{H}^\infty)^{-1} \tilde{\mathbf{y}}}{n}\right] + \mathcal{O}\left(\frac{\log(1/\delta)}{n}\right). \quad (19)$$

**Remark 4.1** In order to show Theorem 2 using this theorem, we need to carefully pick out the exponential parts of  $L$ . Using the methods in Allen-Zhu et al. (2019c) and Cao and Gu (2019), we can show that  $m^*(L, n, \sqrt{\tilde{\mathbf{y}}^T (\mathbf{H}^\infty)^{-1} \tilde{\mathbf{y}}}) \geq \text{poly}(n, L, \sqrt{\tilde{\mathbf{y}}^T (\mathbf{H}^\infty)^{-1} \tilde{\mathbf{y}}})$  is enough.  $\sqrt{\tilde{\mathbf{y}}^T (\mathbf{H}^\infty)^{-1} \tilde{\mathbf{y}}}$  is dealt with by calculating the forward and backward correlation in section 4.1.1 and 4.1.2.

The proof of theorem 3 is in fact a combination of the results in Cao and Gu (2019) and Allen-Zhu et al. (2019c). The really matter thing is how large can  $\sqrt{\tilde{\mathbf{y}}^T (\mathbf{H}^\infty)^{-1} \tilde{\mathbf{y}}}$  be. We can show that:

**Theorem 4** Under the condition of Theorem 3, with probability at least  $1 - \delta$ , there exists matrix  $\mathbf{H}^\infty$  satisfying (18) and

$$\sqrt{\tilde{\mathbf{y}}^T (\mathbf{H}^\infty)^{-1} \tilde{\mathbf{y}}} \leq \mathcal{O}(\mathcal{C}^*). \quad (20)$$

Theorem 2 is a direct corollary of the above two theorems.

#### 4.1 Calculation on Kernel Matrix

The proof of (20) relies on a direct calculation to construct a kernel matrix  $\mathbf{H}^\infty$ . We consider two input  $x_i$  and  $x_j$ . Let  $X_{i,l}$  and  $X_{j,l}$  be the  $l$ -th input of  $x_i$  and  $x_j$ . Let  $D_l \in \mathbb{R}^{m \times m}$  and  $D'_l \in \mathbb{R}^{m \times m}$  be diagonal matrices that,

$$\begin{aligned} (D_l)_{k,k} &= \mathbb{1}\{\mathbf{W}h_{l-1}(x_i) + \mathbf{A}X_{i,l} > 0\} \\ (D'_l)_{k,k} &= \mathbb{1}\{\mathbf{W}h_{l-1}(x_j) + \mathbf{A}X_{j,l} > 0\} \end{aligned} \quad (21)$$

$$\text{Back}_l = BD_L W \cdots D_{l+1} W, \text{Back}'_l = BD'_L W \cdots D'_{l+1} W \quad (22)$$

Then

$$\frac{1}{m} \langle \nabla_{\widetilde{\mathbf{W}}} f(\widetilde{\mathbf{W}}, x_i), \nabla_{\widetilde{\mathbf{W}}} f(\widetilde{\mathbf{W}}, x_j) \rangle = \frac{1}{m} \sum_{l,l'} \langle \text{Back}_l(x_i) \cdot D_l, \text{Back}_{l'}(x_j) \cdot D'_{l'} \rangle \cdot \langle h_l(x_i), h_{l'}(x_j) \rangle \quad (23)$$

Generally  $H_{i,j} = \frac{1}{m} \langle \nabla_{\widetilde{\mathbf{W}}} f(\widetilde{\mathbf{W}}, x_i), \nabla_{\widetilde{\mathbf{W}}} f(\widetilde{\mathbf{W}}, x_j) \rangle$  is hard to deal with. However, in the  $m \rightarrow \infty$  limit, we can use some techniques to do the calculation.

##### 4.1.1 Forward Correlation

**Theorem 5** For fixed  $i, j$ , under the condition in Theorem 3, with probability at least  $1 - \exp(-\Omega(\log^2 m))$ ,

$$|\langle h_l(x_i), h_l(x_j) \rangle - K_{i,j}^l| \leq \mathcal{O}(l^{16} \cdot \log^2 m / \sqrt{m}) \quad (24)$$

And let  $Q_l = \sqrt{(1 + \frac{1}{L^3} \sum_{k=1}^l \|X_{i,k}\|^2) \cdot (1 + \frac{1}{L^3} \sum_{k=1}^l \|X_{j,k}\|^2)}$ ,

$$\begin{aligned} K_{i,j}^1 &= Q_1 \cdot \sum_{r=0}^{\infty} \mu_r^2 [(1 + \frac{1}{L^3} X_{i,1}^T X_{j,1}) / Q_1]^r \\ K_{i,j}^l &= Q_l \cdot \sum_{r=0}^{\infty} \mu_r^2 (\{ \frac{1}{L^3} X_{i,l}^T X_{j,l} + K_{i,j}^{l-1} \} / Q_l)^r \end{aligned} \quad (25)$$

In the above equations,  $\mu_r = \frac{1}{\sqrt{2\pi}} \int_0^\infty \sqrt{2x} h_r(x) e^{-\frac{x^2}{2}} dx$ ,  $h_r(x) = \frac{1}{\sqrt{r!}} (-1)^r e^{\frac{x^2}{2}} \frac{d^r}{dx^r} e^{-\frac{x^2}{2}}$ .

##### 4.1.2 Backward Correlation

**Theorem 6** For  $l \neq l'$ , with probability at least  $1 - \exp(-\Omega(\log^2 m))$ ,

$$|\frac{1}{m} \langle \text{Back}_l(x_i) \cdot D_l, \text{Back}_{l'}(x_j) \cdot D'_{l'} \rangle| \leq \mathcal{O}(\frac{L^4 \log^4 m}{m^{1/4}}). \quad (26)$$

For  $l = l'$ , there is  $F_{i,j}^l$  that, with probability at least  $1 - \exp(-\Omega(\log^2 m))$ ,

$$|\frac{1}{m} \langle \text{Back}_l(x_i) \cdot D_l, \text{Back}_l(x_j) \cdot D'_l \rangle - F_{i,j}^l| \leq \mathcal{O}(\frac{L^4 \log^4 m}{m^{1/4}}). \quad (27)$$

where

$$\Sigma(x) = \frac{1}{2} + \frac{\arcsin(x)}{\pi}, \quad (28)$$

$$F_{i,j}^l \succeq \frac{1}{K} \Sigma(\{ \frac{1}{L^3} \langle X_{i,l}, X_{j,l} \rangle + K_{i,j}^{l-1} \} / Q_l). \quad (29)$$

and  $0 < K \leq \mathcal{O}(1/L^4)$ .

**Remark 4.2** We should note that this theorem is one of the key differences between this work and the methods in Allen-Zhu and Li (2019a). In fact, we must show that there is a constant  $K > 0$  such that  $\frac{1}{m} \langle \text{Back}_l(x_i), \text{Back}_l(x_j) \rangle - K$  is still positive definite. However, is  $K$  large enough thus  $1/K \geq \text{poly}(L)$  rather than  $1/K \leq \exp(-\Omega(L))$ ? This is not a trivial question. One can only get  $K \geq \frac{1}{2L}$  using naive estimation. In Allen-Zhu and Li (2019a),  $\|\mathbf{A}X_l\| \leq \epsilon_x$  is required to make sure  $\text{Back}_l' = \text{Back}_l(x_i) - \text{Back}_l(x_j)$  samll. However after  $k$  steps of training, we can show the approximation error is roughly  $\mathcal{O}(\|\text{Back}'\| \cdot \|\mathbf{W}^k - \mathbf{W}^0\|)$  and  $\|\mathbf{W}^k - \mathbf{W}^0\|_F \sim \sqrt{\tilde{y}^T (\mathbf{H}^\infty)^{-1} \tilde{y}} \sim \mathcal{C}(F^*)$ . Thus the dependence of  $\epsilon_x$  on  $\mathcal{C}(F^*)$  is hard to be dealt with using this method. In this paper, we do not need the normalized condition. Our methods rely on a crucial observation that the function  $\lim_{l \rightarrow \infty} h_l(x_i)^T h_l(x_j) / (\|h_l(x_i)\| \cdot \|h_l(x_j)\|)$  will degenerate to a constant function.

#### 4.1.3 Sketch Proof of Theorem 4

In order to estimate the complexity, we use the results in the last subsection and Proposition 2.4, 2.2 and 2.3.

Proposition 2.4 shows that, in order to estimate  $\sqrt{\tilde{y}^T (\mathbf{H}^\infty)^{-1} \tilde{y}}$ , we need to show

$$\mathbf{H}^\infty \succeq \xi_p \cdot (\mathbf{X}_l^T \mathbf{X}_l)^{\circ p} \quad (30)$$

with  $\xi_p > 0$  for all  $p \in \mathbb{N}, 1 \leq l \leq L$ . Here  $\mathbf{X}_l \in \mathbb{R}^{n \times d} = [X_{1,l}, X_{2,l}, \dots, X_{n,l}]$  and

$$[(\mathbf{X}_l^T \mathbf{X}_l)^{\circ p}]_{i,j} = \{X_{i,l}^T X_{j,l}\}^p. \quad (31)$$

We will show that, there is a matrix  $\mathbf{H}^\infty$ . With probability at least  $1 - \delta$ ,  $H_{ij} = H_{ij}^\infty \pm \mathcal{O}(\frac{L^4 \log^4 m}{m^{1/4}})$  for all  $i, j \in [n]$ , and,

$$H_{i,j}^\infty \succeq \frac{1}{\mathcal{O}(L^4)} \cdot Q_l \Sigma(\{\frac{1}{L^3} \langle X_{i,l}, X_{j,l} \rangle + K_{i,j}^{l-1}\} / Q_l). \quad (32)$$

for all  $l$ .

Based on (32), we can show the following results:

For all  $1 \leq l \leq L$  and all  $k$

$$H_{i,j}^\infty \succeq \frac{1}{\mathcal{O}(L^4)} \Sigma(\{K_{i,j}^l + \frac{1}{L^3} X_{i,l}^T X_{j,l}\} / Q_l) \succeq \Omega(\frac{1}{L^7}) \cdot (\frac{1}{\mathcal{O}(L)})^k \cdot \frac{1}{k^2} (X_{i,l}^T X_{j,l})^k / (\|X_{i,l}\| \cdot \|X_{j,l}\|)^k. \quad (33)$$

This deduces the complexity for the Additive Concept Class in section 2.1,

$$\sqrt{\tilde{y}^T (\mathbf{H}^\infty)^{-1} \tilde{y}} \leq \mathcal{O}(\mathcal{C}^*). \quad (34)$$

As for N-Variables Concept Class,

$$H_{i,j}^\infty \succeq \frac{1}{C_1^N L^4 \cdot L^{2N} \cdot C_{N,p} \cdot (p/N)^N} \cdot (X_{i,r_1}^T X_{j,r_1} + X_{i,r_2}^T X_{j,r_2} \dots + X_{i,r_N}^T X_{j,r_N})^p / (N \cdot \max_n (\|X_{i,r_n}\|) \cdot \max_n (\|X_{j,r_n}\|))^p \quad (35)$$

with some large constant  $C_1 > 0$ . Meanwhile, for any  $l \leq L, a < l$ , let  $Z_{i,l,a} = [X_{i,l}, X_{i,l-1}, \dots, X_{i,l-a}]$ . We have:

$$H_{i,j}^\infty \succeq \Omega(\frac{1}{L^7}) \cdot (\frac{1}{\mathcal{O}(L)})^k \cdot \frac{1}{k^2} (Z_{i,l,a}^T Z_{j,l,a})^k / (\|Z_{i,l,a}\| \cdot \|Z_{j,l,a}\| \cdot 2^a)^k \quad (36)$$

Then from definition of complexity in section 2.2 and Proposition 2.4, we can prove

$$\sqrt{\tilde{y}^T (\mathbf{H}^\infty)^{-1} \tilde{y}} \leq \mathcal{O}(\mathcal{C}^*). \quad (37)$$

Therefore (20) follows.

## 5 Dissicusion

In this paper, we use a new method to avoid the normalized conditions. The main idea is to provide an esitmaton for  $\sqrt{\tilde{y}^T(\mathbf{H}^\infty)^{-1}\tilde{y}}$  in the RNN case directly. However, the value of  $\sqrt{\tilde{y}^T(\mathbf{H}^\infty)^{-1}\tilde{y}}$  is only explicitly calculated for the two-layer case in Arora et al. (2019). In the RNN cases, the neural tangent kernel matrix involves the depth and the weight sharing in the network and difficult to deal with.

In Allen-Zhu and Li (2019a), their method is to reduce the RNN case to

$$f_L \approx \sum_l \text{Back}^{(0)} \cdot \mathbb{1}_{\langle W, h_{l-1} \rangle + AX_l \geq 0} W^* \cdot h_{l-1},$$

which is similar to a summation of  $L$  two-layer networks. And this reduction requires the following operations in Allen-Zhu and Li (2019a):

- 1) Introduce new randomness to keep the independence of rows in the random initialization matrices  $W$  and  $A$  at different depths. Then estimate the perturbation.
- 2) Show the "off-target" Backward Correlation is zero.
- 3) Estimate the "on target" Backward Correlation by introducing a normalized input sequence  $x^{(0)}$ .
- 4) Explicitly construct the approximation.

These steps strongly rely on the normalized condition  $\|X_l\| \ll 1$  and this is apparently unrealistic. Instead, we calculate the kernel matrix and we introduce many new estimation to avoid this condition.

We should note that this expression

$$f_L \approx \sum_l \text{Back}^{(0)} \cdot \mathbb{1}_{\langle W, h_{l-1} \rangle + AX_l \geq 0} W^* \cdot h_{l-1}$$

is additive in itself. Thus the nonlinear interaction between different positions considered in this paper, especially N-variable target functions, **cannot be deduced** using the from this method. In the previous proof, Allen-Zhu and Li (2019a) is to use these steps to reduce the RNN function to a summation of two-layer networks and ignore the correlation between inputs from different locations and this heavily relies on the normalized condition. In our method, we need to consider the information in Back to show the non-linear correlation between the inputs at different positions and prove N-variable target functions are learnable, while Allen-Zhu and Li (2019a). requires the normalized condition to make sure  $\text{Back} \approx \text{Back}^{(0)}$  to be roughly a constant. This is one of the most different parts between this work and Allen-Zhu and Li (2019a).

In our case, since we do no use the normalized condition, we must show the polynomial decay of the constant part in  $\text{Back}$ . As mentioned in Remark 4.2, in our case, it is generally non-trivial to show  $\sqrt{\tilde{y}^T(\mathbf{H}^\infty)^{-1}\tilde{y}} \leq O(\mathcal{C}^*)$  with  $\mathcal{C}^*$  polynomial in  $L$ . Our methods rely on a detailed estimation on the degeneracy of long RNN based on Theorem 5.

## 6 Related Work

**Overparameterized neural network.** In Tian (2017) and Du et al. (2018), it is shown that, for a single-hidden-node ReLU network, under mild assumptions, the loss function is one point convex in a very large area. However, in Safran and Shamir (2018), the authors pointed out that such good properties are rare for networks with multi-hidden nodes, and indicated that an over-parameterization assumption is necessary. Similarly, Hardt et al. (2016) showed that over-parameterization can help in the training process of a linear dynamic system i.e., linear RNN. A different way to show over-parameterization is important as in Freeman and Bruna (2016), this work proved that in the two-layer case if the number of the hidden nodes is large enough, the sub-level sets of the loss will be nearly connected. Their method can also be applied to deep networks with a skip connection in Wang et al. (2020) to study the properties of loss surfaces.

Recent breakthroughs were made in understanding the neural tangent kernel(NTK) Jacot et al. (2018); Alemohammad et al. (2021) of the neural network near the area of the random initialization. In Li and Liang (2018), Du et al. (2019), Allen-Zhu et al. (2019b) and Allen-Zhu et al. (2019c), it is shown

that deep networks with a large hidden size can attain zero training error, under some assumptions of input non-degeneracy. This explains the empirical results Zhang et al. (2017) that DNN can fit training data with even random labels.

There are also some provable convergence results with over-parameterization going beyond NTK. The loss surface of the two-layer over-parameterized network with quadratic activation function was studied in Du and Lee (2018) and Mahdi et al. (2018). They showed that all the bad local minima are eliminated by over-parameterization. For ReLU activation function, in Allen-Zhu and Li (2019b), it is shown that there exists some functions can not be learned by any kernel functions but learnable with less error by a network with a skip connection. Li et al. (2020) provided a convergence result for learning a specific two-layer neural network which can not be learned by any kernel method, including Neural Tangent Kernel.

### Generalization Ability of Deep Learning

Classical VC theory cannot explain the generalization ability of deep learning because the VC-dimension of neural networks is at least linear in the number of parameters Bartlett et al. (2019). Recently, Allen-Zhu et al. (2019a) showed that overparameterized neural networks can learn some notable concept classes of target functions with rich types. Moreover, their work goes beyond the NTK linearization and provides new results on the non-convex interactions of the three-layer network. Meanwhile, Arora et al. (2019) provided a fine-grained analysis on the generalization error and showed the connections to the matrix of the neural tangent kernel. The results were generalized to the multi-layer case in Cao and Gu (2019). Similar results were also studied in Ji and Telgarsky (2020) and Chen et al. (2020b).

Ref. Allen-Zhu et al. (2019a) also considered the generalization error bounds beyond the first-order NTK. It has been shown in Allen-Zhu et al. (2019a) that a three-layer ReLU network can provably learn some notable composite functions and dropout can help to reduce the Rademacher Complexity of the network thus reduce the generalization error bounds. The proof is based on the second-order NTK expansion and saddle points escaping arguments. Higher-order NTK are also studied in Bai and Lee (2020) with provable generalization error bounds. Moreover, it is shown in Chen et al. (2020a) that comparing with the general NTK, deep networks with neural representation can achieve improved sample complexities, while for the first-order NTK, depth may not provide benefits for the learning ability Bietti and Bach (2021).

## 7 Conclusion and Future Work

In this paper, we studied the problem of what type of function can be learned by RNN. In this work, we showed that RNNs can provably learn the two types of functions, the additive concept class and the N-variables concept class in *almost-polynomial in input length many iterations and samples* starting from random initialization. For the additive concept class, we proved the result without the normalized condition and showed the almost-polynomial complexity in input length  $L$ . For the N-variable concept class, we showed that RNN with ReLU activation function can provably learn functions like  $\psi(\langle \beta, [X_{l_1}, \dots, X_{l_N}] \rangle)$ . The complexity of learning such functions grows exponentially with either  $N$  or  $l_0 = \max(l_1, \dots, l_N) - \min(l_1, \dots, l_N)$ , but when one of them is small, the complexity is almost-polynomial in the input length  $L$ .

One of the limitations is that this work relies on the NTK linearization of RNN. One probably direction is to consider the non-convex interactions in RNN and learn more complex functions using the method in Allen-Zhu et al. (2019a). Meanwhile, this work studied RNN with ReLU activation function. This did not consider the “gate” structure in RNN. We believe that a study on GRU, LSTM, and MGU may lead to learning more complex functions with long-term memory.

### Acknowledgement

We would like to thank Professor Wenyu Zhang for his valuable discussion, and Shuai Wang for the great help in writing. We also thank the anonymous reviewers and area chair for their helpful comments. This research was funded by the Fundamental Research Funds for the Central Universities (Grant number 2020YJS012).

## References

- Alemohammad, S., Wang, Z., Balestrieri, R., and Baraniuk, R. (2021). The recurrent neural tangent kernel. In *International Conference on Learning Representations*.
- Allen-Zhu, Z. and Li, Y. (2019a). Can sgd learn recurrent neural networks with provable generalization? In *Advances in Neural Information Processing Systems*, volume 32. Curran Associates, Inc.
- Allen-Zhu, Z. and Li, Y. (2019b). What can resnet learn efficiently, going beyond kernels? In *Advances in Neural Information Processing Systems*, volume 32. Curran Associates, Inc.
- Allen-Zhu, Z., Li, Y., and Liang, Y. (2019a). Learning and generalization in overparameterized neural networks, going beyond two layers. In *Advances in Neural Information Processing Systems*, volume 32. Curran Associates, Inc.
- Allen-Zhu, Z., Li, Y., and Song, Z. (2019b). A convergence theory for deep learning via overparameterization. In Chaudhuri, K. and Salakhutdinov, R., editors, *Proceedings of the 36th International Conference on Machine Learning, ICML 2019, 9-15 June 2019, Long Beach, California, USA*, volume 97 of *Proceedings of Machine Learning Research*, pages 242–252. PMLR.
- Allen-Zhu, Z., Li, Y., and Song, Z. (2019c). On the convergence rate of training recurrent neural networks. In *Advances in Neural Information Processing Systems*, volume 32. Curran Associates, Inc.
- Arora, S., Du, S. S., Hu, W., Li, Z., and Wang, R. (2019). Fine-grained analysis of optimization and generalization for overparameterized two-layer neural networks. In Chaudhuri, K. and Salakhutdinov, R., editors, *Proceedings of the 36th International Conference on Machine Learning, ICML 2019, 9-15 June 2019, Long Beach, California, USA*, volume 97 of *Proceedings of Machine Learning Research*, pages 322–332. PMLR.
- Bai, Y. and Lee, J. D. (2020). Beyond linearization: On quadratic and higher-order approximation of wide neural networks. In *International Conference on Learning Representations*.
- Bartlett, P. L., Harvey, N., Liaw, C., and Mehrabian, A. (2019). Nearly-tight vc-dimension and pseudodimension bounds for piecewise linear neural networks. *J. Mach. Learn. Res.*, 20:63:1–63:17.
- BergJens, C., Reus, P., and Ressel, C. (1984). *Harmonic Analysis on Semigroups Theory of Positive Definite and Related Functions*. Springer Netherlands.
- Bietti, A. and Bach, F. (2021). Deep equals shallow for relu networks in kernel regimes.
- Boucheron, S., Lugosi, G., and Massart, P. (2013). *Concentration inequalities : a non asymptotic theory of independence*. Oxford University Press.
- Cao, Y. and Gu, Q. (2019). Generalization bounds of stochastic gradient descent for wide and deep neural networks. In *Advances in Neural Information Processing Systems*, volume 32. Curran Associates, Inc.
- Chen, M., Bai, Y., Lee, J. D., Zhao, T., Wang, H., Xiong, C., and Socher, R. (2020a). Towards understanding hierarchical learning: Benefits of neural representations. In Larochelle, H., Ranzato, M., Hadsell, R., Balcan, M. F., and Lin, H., editors, *Advances in Neural Information Processing Systems*, volume 33, pages 22134–22145. Curran Associates, Inc.
- Chen, Z., Cao, Y., Zou, D., and Gu, Q. (2020b). How much over-parameterization is sufficient to learn deep relu networks?
- Daniely, A., Frostig, R., and Singer, Y. (2016). Toward deeper understanding of neural networks: The power of initialization and a dual view on expressivity. In Lee, D., Sugiyama, M., Luxburg, U., Guyon, I., and Garnett, R., editors, *Advances in Neural Information Processing Systems*, volume 29. Curran Associates, Inc.
- Du, S. S. and Lee, J. D. (2018). On the power of over-parametrization in neural networks with quadratic activation. *International conference on machine learning*, pages 1328–1337.

- Du, S. S., Lee, J. D., and Tian, Y. (2018). When is a convolutional filter easy to learn. *International conference on machine learning*.
- Du, S. S., Zhai, X., Poczos, B., and Singh, A. (2019). Gradient descent provably optimizes over-parameterized neural networks. In *7th International Conference on Learning Representations, ICLR 2019, New Orleans, LA, USA, May 6-9, 2019*. OpenReview.net.
- Freeman, C. D. and Bruna, J. (2016). Topology and geometry of half-rectified network optimization. *International conference on machine learning*.
- Ge, R., Lee, J. D., and Ma, T. (2017). Learning one-hidden-layer neural networks with landscape design. *CoRR*, abs/1711.00501.
- Hardt, M., Ma, T., and Recht, B. (2016). Gradient descent learns linear dynamical systems. *Journal of Machine Learning Research*, 19.
- Huang, K., Wang, Y., Tao, M., and Zhao, T. (2020). Why do deep residual networks generalize better than deep feedforward networks? - A neural tangent kernel perspective. In *Advances in Neural Information Processing Systems 33: Annual Conference on Neural Information Processing Systems 2020, NeurIPS 2020, December 6-12, 2020, virtual*.
- Jacot, A., Gabriel, F., and Hongler, C. (2018). Neural tangent kernel: Convergence and generalization in neural networks. In Bengio, S., Wallach, H., Larochelle, H., Grauman, K., Cesa-Bianchi, N., and Garnett, R., editors, *Advances in Neural Information Processing Systems*, volume 31. Curran Associates, Inc.
- Ji, Z. and Telgarsky, M. (2020). Polylogarithmic width suffices for gradient descent to achieve arbitrarily small test error with shallow relu networks.
- Li, Y. and Liang, Y. (2018). Learning overparameterized neural networks via stochastic gradient descent on structured data. In Bengio, S., Wallach, H., Larochelle, H., Grauman, K., Cesa-Bianchi, N., and Garnett, R., editors, *Advances in Neural Information Processing Systems*, volume 31. Curran Associates, Inc.
- Li, Y., Ma, T., and Zhang, H. R. (2020). Learning over-parametrized two-layer relu neural networks beyond ntk.
- Mahdi, S., Adel, J., and D., L. J. (2018). Theoretical insights into the optimization landscape of over-parameterized shallow neural networks. *IEEE Transactions on Information Theory*.
- Safran, I. and Shamir, O. (2018). Spurious local minima are common in two-layer relu neural networks. *International conference on machine learning*, pages 4430–4438.
- Tian, Y. (2017). Symmetry-breaking convergence analysis of certain two-layered neural networks with relu nonlinearity. *International conference on learning representations*.
- Wang, L., Shen, B., Zhao, N., and Zhang, Z. (2020). Is the skip connection provable to reform the neural network loss landscape? In Bessiere, C., editor, *Proceedings of the Twenty-Ninth International Joint Conference on Artificial Intelligence, IJCAI-20*, pages 2792–2798. International Joint Conferences on Artificial Intelligence Organization. Main track.
- Zhang, C., Bengio, S., Hardt, M., Recht, B., and Vinyals, O. (2017). Understanding deep learning requires rethinking generalization. In *5th International Conference on Learning Representations, ICLR 2017, Toulon, France, April 24-26, 2017, Conference Track Proceedings*. OpenReview.net.

# Supplementary Materials

## A Flowchart of the Proofs

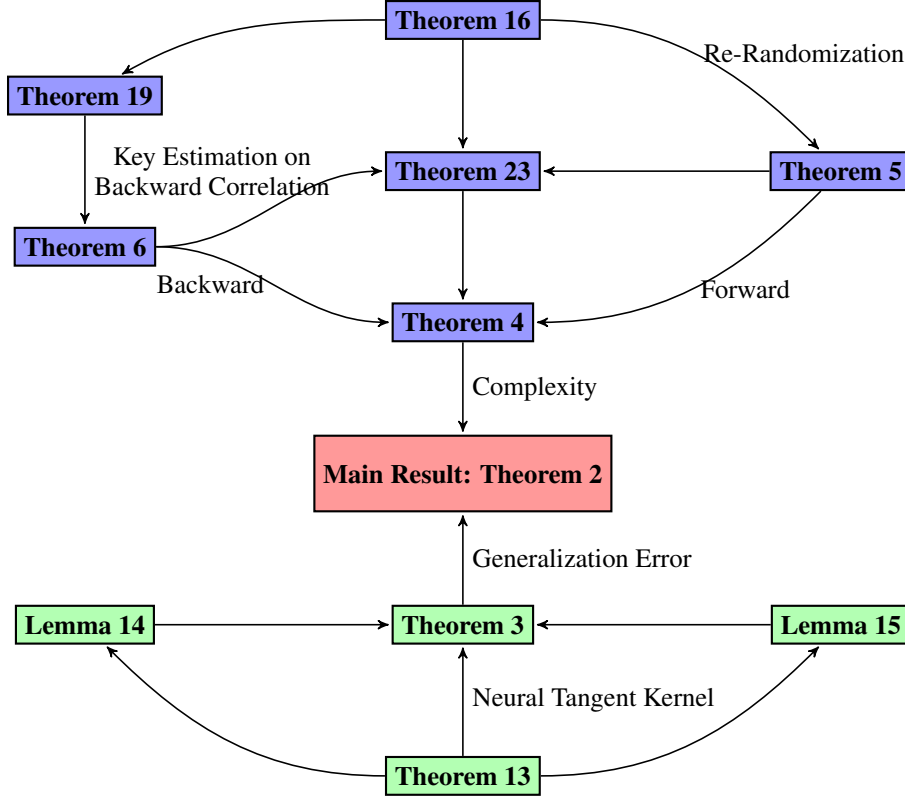

Figure 1: Flowchart of the Proof.

The Flowchart of the proof is shown in Figure 1. There are two parts. The first part is to prove Theorem 3. This is easy by using techniques in Allen-Zhu et al. (2019c) and Cao and Gu (2019). The more important part is to prove Theorem 4. We study the forward and backward correlation in Theorem 5 and 6. In Theorem 19, we show the polynomial degeneration of backward correlation which is crucial to show the complexity is polynomial in  $L$ .

## B Some Probability Theory Lemmas

**Definition 1** A random variable  $X$  is said to be sub-Gaussian with variance proxy  $\sigma^2$  if  $\mathbb{E}[X] = 0$  and for all  $s \in \mathbb{R}$ ,

$$\mathbb{E}[e^{sX}] \leq e^{\frac{\sigma^2 s^2}{2}}. \quad (38)$$

A random variable  $X$  is said to be  $\lambda$ -sub-exponential if  $\mathbb{E}[X] = 0$ , and for all  $s$  that  $|s| \leq \frac{1}{\lambda}$ ,

$$\mathbb{E}[e^{sX}] \leq e^{\frac{s^2 \lambda^2}{2}} \quad (39)$$

For  $\lambda$ -sub-exponential random variable, we have the following standard concentration inequality from Chernoff bound estimation(c.f. Boucheron et al. (2013)):

**Theorem 7** Let  $X_1, X_2, \dots, X_m$  be i.i.d  $\lambda$ -sub-exponential random variable with  $\lambda < \mathcal{O}(1)$ . Let  $0 < \epsilon \leq 1$ . With probability at least  $1 - \exp[-\Omega(m\epsilon^2)]$ ,

$$\left| \frac{1}{m} \sum_{i=1}^m X_i \right| \leq \epsilon \quad (40)$$

Let  $\phi$  be a function with either  $|\phi(x)| \leq |Bx|$  or  $|\phi(x)| \leq B$  for some  $B > 0$ . Assuming  $w$  is a Gaussian random vector, we can show  $\phi(w^T X_1)\phi(w^T X_2) - \mathbb{E}\phi(w^T X_1)\phi(w^T X_2)$  is  $\lambda$ -sub-exponential for some  $\lambda$  by estimating the moments. For  $\mathbb{E}\phi(w^T X_1)\phi(w^T X_2)$ , there is an equation which is a direct corollary of Claim 4.3 in Ge et al. (2017):

**Theorem 8** Consider  $M \in \mathbb{R}^d$ , all the entries of  $M$  are i.i.d. generated from  $N(0, \frac{1}{d})$ , and  $X_1, X_2 \in \mathbb{R}^d$  with  $\|X_1\| = \|X_2\| = 1$ . Let  $\mu_i(\phi)$  denote the  $i$ -th Hermite coefficient of function  $\phi$ , i.e.  $\mu_r(\phi) = \frac{1}{\sqrt{2\pi}} \int_0^\infty \phi(x) h_r(x) e^{-\frac{x^2}{2}} dx$ ,  $h_r(x) = \frac{1}{\sqrt{r!}} (-1)^r e^{\frac{x^2}{2}} \frac{d^r}{dx^r} e^{-\frac{x^2}{2}}$ .

We have

$$\mathbb{E}_M \phi_1(M^T X_2) \phi_2(M^T X_1) = \sum_r \mu_r(\phi_1) \mu_r(\phi_2) (X_1^T X_2)^r. \quad (41)$$

$$\mathbb{E}_M \phi(M^T X_2) \phi(M^T X_1) = \sum_r \mu_r^2(\phi) (X_1^T X_2)^r. \quad (42)$$

Combine the above two theorems and set  $\epsilon = \frac{\log m}{\sqrt{m}}$ . We have:

**Theorem 9** Let  $\mathbf{W} \in \mathbb{R}^{m \times d}$ . All the entries of  $M$  are i.i.d. generated from  $N(0, \frac{2}{m})$ , and  $X_1, X_2 \in \mathbb{R}^d$  with  $\|X_1\| = \|X_2\| = 1$ .  $\phi(x) = \max(0, x)$  denotes the ReLU activation function.  $\mu_i(\phi)$  denotes the  $i$ -th Hermite coefficient of function  $\phi$ .  $W_i$  denotes the  $i$ -th row of  $\mathbf{W}$ . With probability at least  $1 - \exp(-\Omega(\log^2 m))$ ,

$$\begin{aligned} \phi^T(\mathbf{W} X_1) \phi(\mathbf{W} X_2) &= \sum_i \phi^T(W_i X_1) \phi(W_i X_2) \\ &= \mathbb{E}_{w \sim N(0, I_d)} \phi(w^T X_1) \phi(w^T X_2) \pm \mathcal{O}\left(\frac{\log m}{\sqrt{m}}\right) \\ &= \sum_r \mu_r(\phi) \mu_r(\phi) (X_1^T X_2)^r \pm \mathcal{O}\left(\frac{\log m}{\sqrt{m}}\right). \end{aligned} \quad (43)$$

This theorem is a direct corollary of the concentration inequality for the sub-exponential random variable  $\phi(w^T X_1)\phi(w^T X_2)$ .

In the case of ReLU function and its derivative, we can obtain analytical expressions which have been proved in Daniely et al. (2016); Huang et al. (2020):

**Theorem 10** Consider functions  $\phi_1(x) = \sqrt{2} \max(0, x)$  and  $\phi_2(x) = \sqrt{2} \mathbb{1}\{x > 0\}$ . Let  $X_1, X_2 \in \mathbb{R}^d$ ,  $\|X_1\| = \|X_2\| = 1$ ,  $z = X_1^T X_2$ .

$$\mathbb{E}_{w \sim N(0, I_d)} \phi_1(w^T X_1) \phi_1(w^T X_2) = \frac{\sqrt{1-z^2} + (\pi - \arccos(z))z}{\pi}, \quad (44)$$

and

$$\mathbb{E}_{w \sim N(0, I_d)} \phi_2(w^T X_1) \phi_2(w^T X_2) = \frac{\pi - \arccos(z)}{\pi}. \quad (45)$$

For such functions  $f(z) = \mathbb{E}_{w \sim N(0, I_d)} \phi(w^T X_1) \phi(w^T X_2)$ , we can see  $f(0) = \mu_0^2(\phi)$  and  $f'(0) = \mu_1^2(\phi)$ .

## C Technical Lemmas for RNN

Consider equations

$$\begin{aligned} h_l(\mathbf{W}, x) &= \phi(\mathbf{W} h_{l-1} + \mathbf{A} X_l), \\ f(\mathbf{W}, x) &= \mathbf{B}^T h_L(x), \\ \nabla f(\mathbf{W}, x_i) &= \sum_{l=1}^L \text{Back}_l^T D_l \cdot h_l^T(x_i), \\ \text{Back}_l(\mathbf{W}, x_i) &= \mathbf{B}^T D_L \mathbf{W} \cdots D_{l+1} \mathbf{W}. \end{aligned} \quad (46)$$

The properties of  $\nabla f(\mathbf{W}, x_i)$  and  $h_l$  have been already appeared in Allen-Zhu et al. (2019c). We list the results we used in this section.

Let  $\mathbf{W}_0$  be the point of Randomly Initialization and  $B(\mathbf{W}_0, \omega) = \{\mathbf{W} \mid \|\mathbf{W} - \mathbf{W}_0\|_F \leq \omega\}$ . We have:

**Lemma 11** For fixed vector  $x \in \mathbb{R}^d$ ,  $y, z \in \mathbb{R}^m$ . With probability at least  $1 - \exp(-\Omega(m/L^2))$

$$\|\mathbb{1}_{\mathbf{W}_0 y + \mathbf{A}x > 0} \cdot \mathbf{W}_0 z\|_2 \leq \|z\|_2(1 + 1/100L). \quad (47)$$

For fixed  $x \in \mathbb{R}^d$  and all  $y, z$ :

$$\|\mathbb{1}_{\mathbf{W}_0 y + \mathbf{A}x > 0} \cdot \mathbf{W}_0 z\|_2 \leq \|z\|_2(1 + 1/50L). \quad (48)$$

The first equation is from Claim B.13 in Allen-Zhu et al. (2019c). The second one can be easily deduced from a  $\epsilon$ -net argument.

**Lemma 12** (Section B and Section C in Allen-Zhu et al. (2019c)) Let  $\tau_0 \leq \text{poly}(n, L)$ ,  $\omega \leq \tau_0 \cdot m^{-1/2}$ ,  $m \geq \text{poly}(L, n, \delta^{-1})$ . With probability at least  $1 - \delta$ , for all  $i \in [n]$ , all  $l$ , and  $\mathbf{W} \in B(\mathbf{W}_0, \omega)$

- (a)  $\|h_l(\mathbf{W}, x_i)\| \leq \mathcal{O}(l)$ ,
- (b)  $\|\text{Back}_l(\mathbf{W}, x_i) D_l(\mathbf{W}, x_i)\|_2 \leq \mathcal{O}(L^7 \sqrt{m})$ ,
- (c)  $\|\mathbf{W} D_{l_1-1} \dots \mathbf{W} (D_{l+1})\| \leq \mathcal{O}(L^7)$ ,
- (d) For any vector  $v$  with  $\|v\|_0 \leq \mathcal{O}(L^{10/3} \tau_0^{2/3} m^{2/3})$ ,  $\|B^T(D_L^0) \mathbf{W}^0 \dots \mathbf{W}^0 v\| \leq \sqrt{m} L^{5/3} \tau_0^{1/3} \log m \cdot m^{-1/6}$ ,
- (e)  $\|D'_l\|_0 \leq \mathcal{O}(L^{10/3} \tau_0^{2/3} m^{2/3})$ .

The (a) is from the proof of Lemma B.3 and Lemma C.2a in Allen-Zhu et al. (2019c), and the (b) is from Lemma C.9 and Lemma B.11 in Allen-Zhu et al. (2019c). (c) is from Lemma C.7 in Allen-Zhu et al. (2019c). From Corollary B.18, Lemma C.11 and Claim G.2 in Allen-Zhu et al. (2019c) we have (d) and (e).

In our case,  $\|\mathbf{A}X_l\| \leq \frac{1}{L^{3/2}}$ , rather than  $\|\mathbf{A}X_l\| \leq \mathcal{O}(1)$ . These bounds can be improved, but since we mainly care about the exponential dependence on  $L$ , we do not use it.

These equations deduce the following linearization theorem which is an analogue of Lemma 4.1 in Cao and Gu (2019):

**Theorem 13** With probability at least  $1 - \mathcal{O}(n) \cdot \exp(-\Omega(\log m))$ , for all  $i \in [n]$  and  $\mathbf{W}, \mathbf{W}' \in B(\mathbf{W}_0, \omega)$ ,

$$|f(\mathbf{W}', x_i) - f(\mathbf{W}, x_i) - \langle \nabla f(\mathbf{W}, x_i), \mathbf{W}' - \mathbf{W} \rangle| \leq \mathcal{O}(\omega^{1/3} L^{10} \log m \sqrt{m}) \|\mathbf{W}' - \mathbf{W}\|_2. \quad (49)$$

**Proof:** Let

$$\begin{aligned} h_L(x) &= h_L(\mathbf{W}, x), \quad h_L(\mathbf{W}', x) = h_L(x) + h'_L(x), \\ D_l &= D_l(\mathbf{W}, x), \quad D'_l = D_l(\mathbf{W}', x), \quad D_l^0 = D_l(\mathbf{W}_0, x). \end{aligned} \quad (50)$$

By Claim G.2 in Allen-Zhu et al. (2019c), there exists diagonal matrices  $D'_l$ ,  $\{D''_l\}_{ii} \neq 0$  if and only if  $\{D'_l\}_{ii} \neq 0$ ,  $\|D''_l\|_0 \leq \|D'_l\|_0 \leq \mathcal{O}(L^{10/3} \tau_0^{2/3} m^{2/3})$ , and

$$\begin{aligned} B^T(h_L(x) + h'_L(x)) - B^T h_L(x) &= \sum_{l=1}^{L-1} B^T(D_L + D''_L) \mathbf{W}' \dots (D_{l+1} + D''_{l+1}) \\ &\quad \cdot (\mathbf{W}' - \mathbf{W}) h_l(x). \end{aligned} \quad (51)$$

Then,

$$\begin{aligned} f(\mathbf{W}', x_i) - f(\mathbf{W}, x_i) - \langle \nabla f(\mathbf{W}, x_i), \mathbf{W}' - \mathbf{W} \rangle &= \sum_{l=1}^{L-1} B^T(D_L + D''_L) \mathbf{W}' \dots (D_{l+1} + D''_{l+1}) \cdot (\mathbf{W}' - \mathbf{W}) h_l(x) \\ &\quad - B^T D_L \mathbf{W} \dots \mathbf{W} D_{l+1} \cdot (\mathbf{W}' - \mathbf{W}) h_l(x). \end{aligned} \quad (52)$$

To prove the theorem, same as Lemma 5.7 in Allen-Zhu et al. (2019b), we have the following result: Let  $D_l^{0/1}$  be diagonal matrix and  $(D_l^{0/1})_{ii} = 0$  if  $(D_l + D_l'' - D_l^0)_{ii} = 0$ ,  $(D_l^{0/1})_{ii} = 1$  if  $(D_l + D_l'' - D_l^0)_{ii} \neq 0$ . With probability at least  $1 - \delta$ ,

$$\begin{aligned} & \|B^T(D_L + D_L'')\mathbf{W}' \dots (D_{l+1} + D_{l+1}'') \cdot \mathbf{W}'\rangle - B^T D_L \mathbf{W} \dots \mathbf{W} D_{l+1} \cdot \mathbf{W}\| \\ & \leq \mathcal{O}\left(\sum_{l_1=l+1}^L \underbrace{\|B^T(D_L^0)\mathbf{W}^0 \dots \mathbf{W}^0(D_{l_1}^{0/1})\|}_{T_1} \cdot \|D_{l_1}''\| \cdot \underbrace{\|(D_{l_1}^{0/1})\mathbf{W}' D_{l_1-1}' \dots \mathbf{W}'(D_{l+1}')\|}_{T_2}\right) \quad (53) \\ & \stackrel{(a)}{\leq} \mathcal{O}(\sqrt{m}L^{5/3+8}\tau_0^{1/3}\log m \cdot m^{-1/6}) \leq \mathcal{O}(\sqrt{m}L^{10}\omega^{1/3}\log m). \end{aligned}$$

In (a),  $T_2 \leq \mathcal{O}(L^7)$  is from (c) in Lemma 12. From (d) in Lemma 12 and  $\|D_l''\|_0 \leq \mathcal{O}(L^{10/3}\tau_0^{2/3}m^{2/3})$ ,  $T_1 \leq \sqrt{m}L^{5/3}\tau_0^{1/3}\log m \cdot m^{-1/6}$ . ■

**Remark C.1** In this theorem,

$$|f(\mathbf{W}', x_i) - f(\mathbf{W}, x_i) - \langle \nabla f(\mathbf{W}, x_i), \mathbf{W}' - \mathbf{W} \rangle| \leq \mathcal{O}(\omega^{1/3}L^{10}\log m\sqrt{m})\|\mathbf{W}' - \mathbf{W}\|_2. \quad (54)$$

And in Cao and Gu (2019), there is a similar result that

$$|f(\mathbf{W}', x_i) - f(\mathbf{W}, x_i) - \langle \nabla f(\mathbf{W}, x_i), \mathbf{W}' - \mathbf{W} \rangle| \leq \mathcal{O}(\omega^{1/3}L^2\sqrt{\log m\sqrt{m}})\|\mathbf{W}' - \mathbf{W}\|_2. \quad (55)$$

The differences on  $\log m$  are from that Lemma 4.4 in Allen-Zhu et al. (2019b) says if  $\|u\|_0 \leq s$ ,  $|B^T(D_L + D_L'')\mathbf{W}' \dots (D_{l+1} + D_{l+1}'') \cdot \mathbf{W}'_{l+1}u| \leq \mathcal{O}(\sqrt{s}\log m)$  and Corollary B.18 in Allen-Zhu et al. (2019c) says  $|B^T(D_L + D_L'')\mathbf{W}' \dots (D_{l+1} + D_{l+1}'') \cdot \mathbf{W}'u| \leq \mathcal{O}(\sqrt{s}\log m)$  for RNN case.

## D Generalization properties: Proof of Theorem 3

**Lemma 14** Denote  $L_i(\mathbf{W}) = \ell(y_i \cdot f(\mathbf{W}, x_i))$ . Suppose there exists  $\mathbf{W}^* \in B(\mathbf{W}_0, R/\sqrt{m})$  with  $R \leq \text{poly}(n, L)$ ,  $L_i(\mathbf{W}^*) \leq \frac{1+R^2}{n}$ . For any  $\delta$ , there exists

$$m^*(n, \delta, R, L) = \text{poly}(n, R, L, \delta^{-1}) \quad (56)$$

such that if  $m > m^*$ , with probability at least  $1 - \delta$ , SGD with  $\eta = 1/m$  for some small enough  $\nu$  will output:

$$\frac{1}{n} \sum_{i=1}^n L_D^{0-1}(\mathbf{W}^i) \leq \mathcal{O}\left(\frac{1}{n}\right) + \mathcal{O}\left(\frac{R^2}{n}\right) + \mathcal{O}\left(\frac{\log(1/\delta)}{n}\right). \quad (57)$$

**Proof of Lemma 14:**

Firstly, for all  $i$ ,  $\mathbf{W} \in B(\mathbf{W}_0, \omega)$ ,  $\omega \leq R/m^{1/2}$ , from Lemma 12,  $\|\nabla f(\mathbf{W}, x_i)\|_F \leq \mathcal{O}(L^8\sqrt{m})$ .

$$\|\mathbf{W}^{i+1} - \mathbf{W}^0\|_F \leq \sum_{k=1}^i \|\mathbf{W}^{k+1} - \mathbf{W}^k\|_F \leq \mathcal{O}(n\eta L^8\sqrt{m}) \leq \frac{L^8 R}{\sqrt{m}} \leq \mathcal{O}(\tau_0/m^{1/2}) \quad (58)$$

with  $\tau_0 \leq \text{poly}(n, L)$ . Thus we can use Theorem 13. We have,

$$\begin{aligned} L_i(\mathbf{W}^i) - L_i(\mathbf{W}^*) & \leq \langle \nabla_{\mathbf{W}} L_i(\mathbf{W}^i), \mathbf{W}^i - \mathbf{W}^* \rangle \\ & \quad + |\ell'(y_i f(\mathbf{W}, x_i)) \cdot y_i| \cdot \mathcal{O}(\omega^{1/3}L^{10}\log m\sqrt{m})\|\mathbf{W}^i - \mathbf{W}^*\|_2 \\ & = \frac{\langle \mathbf{W}^i - \mathbf{W}^{i+1}, \mathbf{W}^i - \mathbf{W}^* \rangle}{\eta} + \mathcal{O}(\omega^{1/3}L^{10}\log m\sqrt{m})\|\mathbf{W}^i - \mathbf{W}^*\|_2 \end{aligned} \quad (59)$$

Therefore,

$$\begin{aligned} \sum_{i=1}^n L_i(\mathbf{W}^i) & \leq \sum_{i=1}^n \{L_i(\mathbf{W}^*) + \frac{R^2}{2\eta m} + \mathcal{O}(\omega^{1/3}L^{10}\log m\sqrt{m})\sum_{i=1}^n \|\mathbf{W}^i - \mathbf{W}^*\|_2\}, \\ & \leq \sum_{i=1}^n \{L_i(\mathbf{W}^*) + \frac{R^2}{2\eta m} + \mathcal{O}(L^{10}\log m \cdot n \cdot R^{4/3} \cdot m^{-1/6})\}, \\ & \stackrel{(a)}{\leq} \sum_{i=1}^n L_i(\mathbf{W}^*) + R^2. \end{aligned} \quad (60)$$

In (a), we use  $m > m^* \sim \text{poly}(n, L)$ .

Therefore,

$$\frac{1}{n} \sum_{i=1}^n L_i(\mathbf{W}^i) \leq \frac{1+R^2}{n} + \frac{R^2}{n}. \quad (61)$$

The cross-entropy function  $\ell(x)$  satisfies that  $L'_i(\mathbf{W}^i) \leq L_i(\mathbf{W}^i)$  and  $L_i^{0-1}(\mathbf{W}^i) \leq L'_i(\mathbf{W}^i)$ , where

$$L'_i(\mathbf{W}^i) = -\ell'(y_i f(\mathbf{W}, x_i)). \quad (62)$$

And  $-\ell'(x)$  is bounded. Using the boundedness and a martingale Bernstein bound argument as Lemma 4.3 in Ji and Telgarsky (2020), we have

$$\frac{1}{n} \sum_{i=1}^n L_D^{0-1}(\mathbf{W}^i) \leq \mathcal{O}\left(\frac{1}{n}\right) + \mathcal{O}\left(\frac{R^2}{n}\right) + \mathcal{O}\left(\frac{\log(1/\delta)}{n}\right). \quad (63)$$

■

**Remark D.1** The result of generalization error  $1/n$  is this better than that in Cao and Gu (2019)  $1/\sqrt{n}$ , which shows

$$\frac{1}{n} \sum_{i=1}^n L_D^{0-1}(\mathbf{W}^i) \leq \frac{4}{n} \sum_{i=1}^n L_i(\mathbf{W}^*) + \mathcal{O}\left(\frac{R}{\sqrt{n}}\right) + \mathcal{O}\left(\sqrt{\frac{\log(1/\delta)}{n}}\right). \quad (64)$$

This is because Lemma 4.3 in Ji and Telgarsky (2020) makes use of the boundedness of  $L_i(\mathbf{W})$ . Thus it is applicable in this theorem. There is also a similar argument in Lemma 5.6 of Chen et al. (2020b).

**Lemma 15** Under the condition of Theorem 3, with probability at least  $1 - \delta$ , there exists  $\mathbf{W}^* \in B(\mathbf{W}_0, R/\sqrt{m})$ , such that  $L_i(\mathbf{W}^*) \leq \frac{1+R^2}{n}$ ,  $R \leq \tilde{\mathcal{O}}(L\sqrt{\tilde{\mathbf{y}}^T(\mathbf{H}^\infty)^{-1}\tilde{\mathbf{y}}})$ .

**Proof of Lemma 15:**

Let  $\epsilon$  be the matrix in (18),

$$\mathbf{G} = m^{-1/2} \cdot (\text{vec}[\nabla f(\mathbf{W}^0, x_1)], \text{vec}[\nabla f(\mathbf{W}^0, x_2)], \dots, \text{vec}[\nabla f(\mathbf{W}^0, x_n)]) \in \mathbb{R}^{m^2 \times n}.$$

$$\mathbf{G} + \epsilon = \mathbf{P}\mathbf{\Lambda}\mathbf{Q}^T. \quad (65)$$

is the singular value decomposition. Note that  $m^2 \gg n$ . We can set  $\epsilon^T \mathbf{G} = 0$  without changing  $\epsilon^T \epsilon$ .

With probability at least  $1 - \delta$ , for all  $i \in [n]$ ,  $|f(\mathbf{W}^0, x_i)| \leq \mathcal{O}(L \log(n/\delta))$ . We assume  $w^* = \mathbf{P}\mathbf{\Lambda}^{-1}\mathbf{Q}^T(B \cdot \tilde{\mathbf{y}})$ , with  $0 < |f(\mathbf{W}^0, x_i)| + \log\{1/[exp(n^{-1}) - 1]\} + 0.01 < B \leq \mathcal{O}(L \log(n/\delta))$  for all  $i \in [n]$ , then  $\|w^*\|_2^2 \leq B^2 \tilde{\mathbf{y}}^T(\mathbf{H} + \epsilon^T \epsilon)^{-1} \tilde{\mathbf{y}}$ . and  $\mathbf{G}^T w^* = B \cdot \tilde{\mathbf{y}} - \epsilon^T w^*$ . Meanwhile, reshape  $w^*$  as  $\mathbf{W}^* \in \mathbb{R}^{m \times m}$ , then we have

$$\langle \nabla f(\mathbf{W}^0, x_i), \mathbf{W}^* - \mathbf{W}^0 \rangle = B \cdot \tilde{y}_i \pm \|\epsilon\|_F \cdot \sqrt{\tilde{\mathbf{y}}^T(\mathbf{H} + \epsilon)^{-1} \tilde{\mathbf{y}}} = B \cdot \tilde{y}_i \pm 0.01. \quad (66)$$

Therefore  $\mathbf{W}^* \in B(\mathbf{W}_0, \tilde{\mathcal{O}}(L\mathcal{C}^*/\sqrt{m}))$ , and

$$\begin{aligned} \ell(y_i \cdot (f(\mathbf{W}^*, x_i))) &\leq \ell(y_i \cdot \{f(\mathbf{W}^0, x_i) + \langle \nabla f(\mathbf{W}^0, x_i), \mathbf{W}^* - \mathbf{W}^0 \rangle\}) \\ &\quad + |\ell'(y_i f(\mathbf{W}, x_i)) \cdot y_i| \cdot \mathcal{O}(L^{10} \log m \cdot n \cdot R^{4/3} \cdot m^{-1/6}) \\ &\leq \ell(y_i \cdot \{f(\mathbf{W}^0, x_i) + \langle \nabla f(\mathbf{W}^0, x_i), \mathbf{W}^* - \mathbf{W}^0 \rangle\}) \\ &\quad + R^2/n \\ &\leq \ell(\log(1/[exp(n^{-1}) - 1])) + R^2/n, \\ &\leq n^{-1} + R^2/n. \end{aligned} \quad (67)$$

Thus  $L_i(\mathbf{W}^*) \leq \frac{1+R^2}{n}$ . ■

Then Theorem 3 follows from Lemma 14 and 15.

## E Forward Correlation: Proof of Theorem 5

**Theorem 16** Consider equation  $h_l'(x_1) = \phi(\mathbf{W}_l h_{l-1}'(x_l) + \mathbf{A}_l X_l)$ , where the entries of  $\mathbf{W}^l$  and  $\mathbf{A}^l$  are i.i.d. generated from  $N(0, \frac{2}{m})$  and  $N(0, \frac{2}{L^3 m})$ .  $\mathbf{W}^l, \mathbf{A}^l$  and  $\mathbf{W}^{l'}, \mathbf{A}^{l'}$  are independent when  $l \neq l'$ . With probability at least  $1 - L^2 \exp(-\Omega(\log^2 m))$ . For all  $1 < l \leq L$ , we have

$$|h_l^T(x) h_l(x') - h_l'^T(x) h_l'(x')| \leq \mathcal{O}(L^2 \log^2 m / \sqrt{m}) \quad (68)$$

for  $x, x' = x_1, x_2$ .

In order to prove the theorem, firstly we claim that

**Lemma 17** Let  $h_l(x) = \phi(\mathbf{W} h_{l-1}(x) + \mathbf{A} X_l)$ .  $\tilde{h}_l(x) = \phi(\tilde{\mathbf{W}} \tilde{h}_{l-1}(x) + \tilde{\mathbf{A}} X_l)$  is defined by  $\tilde{\mathbf{W}}, \tilde{\mathbf{A}}, \tilde{\mathbf{W}}, \tilde{\mathbf{A}}$  and  $\mathbf{W}, \mathbf{A}$  are i.i.d. Then for any  $0 < l, l' < L$ , with probability at least  $1 - L^2 \exp(-\Omega(\log^2 m))$ ,

$$|h_l^T(x) h_{l'}(x') - \bar{h}_l^T(x) \bar{h}_{l'}(x')| \leq \mathcal{O}(l^2 \log^2 m / \sqrt{m}) \quad (69)$$

where

$$\begin{aligned} \bar{h}_l(x) &= \phi(\mathbf{W} \tilde{h}_{l-1}(x) + \mathbf{A} X_l) \\ \bar{h}_{l'}(x') &= \phi(\mathbf{W} \tilde{h}_{l'-1}(x') + \mathbf{A} X_{l'}) \end{aligned}$$

**Proof of Theorem 16:**

In the case  $l = 1$ ,  $h_1(x) = \phi(\mathbf{W} h_0 + \mathbf{A} X_1)$ .

From Theorem 9 we have, with probability at least  $1 - \exp(-\Omega(\log^2 m))$

$$h_1^T(x) h_1(x') = \mathbb{E} h_1^T(x) h_1(x') \pm \mathcal{O}(\log^2 m / m) = h_1'^T(x) h_1'(x') \pm \mathcal{O}(\log^2 m / \sqrt{m}) \quad (70)$$

The theorem is true.

Supposing the theorem is true for  $l$ , for  $l + 1$ , using Lemma 17

$$h_{l+1}^T(x) h_{l+1}(x') = \mathbb{E} \phi(\mathbf{W} \tilde{h}_l(x') + \mathbf{A} X_{l+1}') \phi(\mathbf{W} \tilde{h}_l(x) + \mathbf{A} X_{l+1}) \pm \mathcal{O}(l^2 \log^2 m / \sqrt{m}) \quad (71)$$

$$\mathbf{W} \tilde{h}_l(x) + \mathbf{A} X_{l+1} = [\mathbf{W} \quad L^{3/2} \mathbf{A}] \cdot \begin{bmatrix} \tilde{h}_l(x) \\ \frac{1}{L^{3/2}} X_{l+1} \end{bmatrix} = \mathbf{M} \cdot z \quad (72)$$

Thus

$$\begin{aligned} & \mathbb{E} \phi(\mathbf{W} \tilde{h}_l(x') + \mathbf{A} X_{l+1}') \phi(\mathbf{W} \tilde{h}_l(x) + \mathbf{A} X_{l+1}) \\ &= \mathbb{E}_{w \sim N(0, \sqrt{2} \mathbf{I}_{m+d})} \phi(\mathbf{w}^T z) \phi(\mathbf{w}^T z') \\ &= h_{l+1}'^T(x) h_{l+1}'(x') \pm \mathcal{O}(l^2 \log^2 m / \sqrt{m}) \\ & h_{l+1}^T(x) h_{l+1}(x') = h_{l+1}'^T(x) h_{l+1}'(x') \pm \mathcal{O}((l+1)^{16} \log^2 m / \sqrt{m}). \end{aligned} \quad (73)$$

■

**Proof of Lemma 17:**

In the case  $l = 1$ , this is true from Theorem 9.

For  $l > 1$ , let  $\mathbf{U}_l \in \mathbb{R}^{m \times 2l}$  denote column orthonormal matrix using Gram-Schmidt as

$$\mathbf{U}_l = GS(h_1(x_1), h_1(x_2), \dots, h_l(x_1), h_l(x_2)). \quad (74)$$

We can write

$$\mathbf{W} h_l = \mathbf{W} \mathbf{U}_{l-1} \mathbf{U}_{l-1}^T h_{l-1} + \mathbf{W} (\mathbf{I} - \mathbf{U}_{l-1} \mathbf{U}_{l-1}^T) h_l, \quad (75)$$

and

$$h_{l+1}(x) = \phi(\mathbf{W} \mathbf{U}_{l-1} \mathbf{U}_{l-1}^T h_l + \mathbf{W} (\mathbf{I} - \mathbf{U}_{l-1} \mathbf{U}_{l-1}^T) h_l + \mathbf{A} X_{l+1}) \quad (76)$$

Consider

$$\begin{aligned} h_{l+1}(x_2)^T h_{l+1}(x_1) = & \phi(WU_{l-1}U_{l-1}^T h_l(x_2) + W(I - U_{l-1}U_{l-1}^T)h_l(x_2) + Ax_{2,l+1})^T \\ & \cdot \phi(WU_{l-1}U_{l-1}^T h_l(x_1) + W(I - U_{l-1}U_{l-1}^T)h_l(x_1) + Ax_{1,l+1}) \end{aligned} \quad (77)$$

We write  $z_1 = (I - U_{l-1}U_{l-1}^T)h_l(x_1)$ ,  $z_2 = (I - U_{l-1}U_{l-1}^T)h_l(x_2)$ .  $q_1 = U_{l-1}^T h_l(x_1)$ ,  $q_2 = U_{l-1}^T h_l(x_2)$ .

$$z_2 = \frac{\langle z_1, z_2 \rangle z_1}{\|z_1\|^2} + (I - z_1 z_1^T / \|z_1\|^2) z_2 \quad (78)$$

Then

$$\begin{aligned} h_{l+1}(x_2)^T h_{l+1}(x_1) = & \phi(WU_{l-1}q_2 + W \frac{\langle z_1, z_2 \rangle z_1}{\|z_1\|^2} + W(I - z_1 z_1^T / \|z_1\|^2) z_2 + Ax_{2,l+1})^T \\ & \cdot \phi(WU_{l-1}q_1 + Wz_1 + Ax_{1,l+1}) \end{aligned} \quad (79)$$

Thus

$$\begin{aligned} h_{l+1}(x_2)^T h_{l+1}(x_1) = & \phi([M_1 \ M_2 \ M_3 \ M_4] \cdot \begin{bmatrix} q_2 \\ \frac{\langle z_1, z_2 \rangle}{\|z_1\|} \\ \|(I - z_1 z_1^T / \|z_1\|^2) z_2\| \\ x_{2,l+1} \end{bmatrix})^T \\ & \cdot \phi([M_1 \ M_2 \ M_3 \ M_4] \cdot \begin{bmatrix} q_1 \\ \|z_1\| \\ 0 \\ x_{1,l+1} \end{bmatrix}) \end{aligned} \quad (80)$$

where

$$[M_1 \ M_2 \ M_3 \ M_4] = [WU_{l-1} \ Wz_1 / \|z_1\| \ W(I - z_1 z_1^T / \|z_1\|^2) z_2 / \|(I - z_1 z_1^T / \|z_1\|^2) z_2\| \ A] \quad (81)$$

Let

$$\begin{aligned} E_2 = & \begin{bmatrix} q_2 \\ \frac{\langle z_1, z_2 \rangle}{\|z_1\|} \\ \|(I - z_1 z_1^T / \|z_1\|^2) z_2\| \\ x_{2,l+1} \end{bmatrix} \\ E_1 = & \begin{bmatrix} q_1 \\ \|z_1\| \\ 0 \\ x_{1,l+1} \end{bmatrix} \end{aligned} \quad (82)$$

We have  $E_2^T E_1 = h_l(x_2)^T h_l(x_1) + x_{2,l+1}^T x_{1,l+1}$ .

In order to study  $h_{l+1}(x_2)^T h_{l+1}(x_1)$ , we can follow the method in the proof of Claim B.4 and Claim B.4 in Allen-Zhu et al. (2019c). Firstly fix  $E_1, E_2$ , with probability at least  $1 - \exp(-\Omega(\log^2 m))$ ,

$$\begin{aligned} & \phi([M_1 \ M_2 \ M_3 \ M_4] \cdot E_2)^T \cdot \phi([M_1 \ M_2 \ M_3 \ M_4] \cdot E_1) \\ & = \mathbb{E}_{M \sim \mathcal{N}(0, I)} \phi(ME_2) \phi(ME_1) \pm \mathcal{O}((l+1)^2 \frac{\log^2 m}{\sqrt{m}}) \end{aligned} \quad (83)$$

Then use  $\epsilon$ -net. We also have for any  $E_1, E_2$ ,

$$\begin{aligned} & \phi([M_1 \ M_2 \ M_3 \ M_4] \cdot E_2)^T \cdot \phi([M_1 \ M_2 \ M_3 \ M_4] \cdot E_1) \\ & = \mathbb{E}_{M \sim \mathcal{N}(0, I)} \phi(ME_2) \phi(ME_1) \pm \mathcal{O}((l+1)^2 \frac{\log^2 m}{\sqrt{m}}) \end{aligned} \quad (84)$$

Thus

$$\begin{aligned} & h_{l+1}(x')^T h_{l+1}(x) \\ & = \bar{h}_{l+1}(x')^T \bar{h}_{l+1}(x) \pm \mathcal{O}((l+1)^2 \log^2 m / \sqrt{m}). \end{aligned} \quad (85)$$

The theorem follows. ■

Combing above theorems, Theorem 8,9 and 10, we have

**Lemma 18** *Let*

$$Q_l = \sqrt{\left(1 + \frac{1}{L^3} \sum_{k=1}^l \|X_{i,k}\|^2\right) \cdot \left(1 + \frac{1}{L^3} \sum_{k=1}^l \|X_{j,k}\|^2\right)}$$

$$\Gamma(z) = \frac{\sqrt{1-z^2} + (\pi - \arccos(z))z}{\pi}$$

*There exists  $K_{i,j}^l$  such that with probability at least  $1 - L^2 \exp(-\Omega(\log^2 m))$ ,*

$$|h_l^T(x_i)h_l(x_j) - K_{i,j}^l| \leq \mathcal{O}\left(\frac{l^{16} \log^2 m}{\sqrt{m}}\right). \quad (86)$$

*And*

$$K_{i,j}^1 = Q_1 \cdot \Gamma([1 + \frac{1}{L^3} X_{i,1}^T X_{j,1}]/Q_1)$$

$$K_{i,j}^l = Q_l \cdot \Gamma(\{\frac{1}{L^3} X_{i,l}^T X_{j,l} + K_{i,j}^{l-1}\}/Q_l)^r \quad (87)$$

Thus Theorem 5 follows.

## F Backward Correlation: Proof of Theorem 6

**Theorem 19** *For  $l \neq l'$ , with probability at least  $1 - L^2 \exp(-\Omega(\log^2 m))$ ,*

$$|\frac{1}{m} \langle \text{Back}_l(x_i) \cdot D_l, \text{Back}_{l'}(x_j) \cdot D_{l'} \rangle| \leq \mathcal{O}\left(\frac{L^4 \log^4 m}{m^{1/4}}\right). \quad (88)$$

*For  $l = l'$ , with probability at least  $1 - L^2 \exp(-\Omega(\log^2 m))$ ,*

$$\frac{1}{m} \langle \text{Back}_l(x_i) \cdot D_l, \text{Back}_l(x_j) \cdot D_l \rangle \succeq \Omega(1/L^4) \cdot \Sigma(\{\frac{1}{L^3} \langle X_{i,l}, X_{j,l} \rangle + K_{i,j}^{l-1}\}/Q_l) \pm \mathcal{O}\left(\frac{L^4 \log^4 m}{m^{1/4}}\right). \quad (89)$$

**Proof of (88):**

The proof of (88) is almost a line-by-line copy of the proof in section C of Allen-Zhu and Li (2019a), but there are some minor differences.

Let  $\zeta_1, \dots, \zeta_m$  be a random orthonormal basis of  $\mathbb{R}^m$ . Then divide all the  $m$  coordinates into  $\sqrt{m}$  chunks  $N_1, N_2, \dots, N_{m^{1/2}}$  of the size  $N = \sqrt{m}$ .

Define

$$z_{1,0} = D_l \zeta_1, z'_{1,0} = D'_l \zeta_1, \dots, z_{N,0} = D_l \zeta_N, z'_{N,0} = D'_l \zeta_N \quad (90)$$

and

$$z_{i,a} = D_{l+a} W \cdots D_{l+1} W D_l z_{i,1}$$

$$z'_{i,a} = D'_{l'+a} W \cdots D'_{l'+1} W D'_{l'} z'_{i,1} \quad (91)$$

$$Z_{p,a} = GS(h_1, \dots, h_{\max(l,l')}, z_{1,1}, \dots, z_{N,1}, z'_{1,1}, \dots, z'_{N,1}, \dots, z_{1,a}, \dots, z_{p,a}, z'_{1,a}, \dots, z'_{p,a}) \quad (92)$$

We claim that, with probability at least  $1 - L^2 \exp(-\Omega(\log^2 m))$ , for all  $a$ ,

$$\|Z_{p,a}^T z_{p,a}\| \leq \mathcal{O}\left(\frac{L^3 \sqrt{N} \log^3 m}{\sqrt{m}}\right). \quad (93)$$

When  $a = 0$ ,

$$Z_{p,0}^T z_{p,0} = Z_{p,0}^T D_l \zeta_1 \quad (94)$$

With probability at least  $1 - \exp(-\Omega(\log^2 m))$ ,

$$\|Z_{p,0}^T z_{p,0}\| \leq \mathcal{O}(l \log m / \sqrt{m}). \quad (95)$$

For  $a > 1$ ,

$$Z_{p,a+1}^T z_{p,a+1} = Z_{p,a+1}^T D_{l+a+1} (W(I - Z_{p,a+1} Z_{p,a+1}^T) z_{p,a} + W Z_{p,a+1} Z_{p,a+1}^T z_{p,a}), \quad (96)$$

$$\begin{aligned} \|Z_{p,a+1}^T D_{l+a+1} W Z_{p,a+1} Z_{p,a+1}^T z_{p,a}\| &\leq \|D_{l+a+1} W Z_{p,a+1} Z_{p,a+1}^T z_{p,a}\| \\ &\leq \|Z_{p,a+1}^T z_{p,a}\| (1 + \frac{1}{50L}), \end{aligned} \quad (97)$$

The last step is from Lemma 11.

And

$$\|Z_{p,a+1}^T D_{l+a+1} W(I - Z_{p,a+1} Z_{p,a+1}^T) z_{p,a}\| \leq \mathcal{O}(\frac{(l+a)^3 \sqrt{N} \log^2 m}{\sqrt{m}}). \quad (98)$$

is because  $W(I - Z_{p,a+1} Z_{p,a+1}^T) z_{p,a} \sim N(0, (2\mathbf{I}/m) \cdot \|(I - Z_{p,a+1} Z_{p,a+1}^T) z_{p,a}\|^2)$ .

This claim follows that,

$$\sum_{p \in [N]} \Xi_p = \sum_p B^T (I - Z_{p,a} Z_{p,a}^T) z_{p,a} \cdot B^T (I - Z_{p,a'} Z_{p,a'}^T) z'_{p,a'} \pm \mathcal{O}(m^{1/4} L^3 \log^4 m) \quad (99)$$

In the case  $a \neq a'$ ,  $(I - Z_{p,a} Z_{p,a}^T) z_{p,a}$  and  $(I - Z_{p,a'} Z_{p,a'}^T) z'_{p,a'}$  are mutually orthogonal. With probability at least  $1 - \exp(-\Omega(\log^2 m))$ ,

$$|\sum_p B^T (I - Z_{p,a} Z_{p,a}^T) z_{p,a} \cdot B^T (I - Z_{p,a'} Z_{p,a'}^T) z'_{p,a'}| \leq \mathcal{O}(\log^4 m) \quad (100)$$

Thus

$$|\frac{1}{m} \langle \text{Back}_l(x_i) \cdot D_l, \text{Back}_{l'}(x_j) \cdot D_{l'} \rangle| \leq \mathcal{O}(\frac{L^3 \log^4 m}{m^{1/4}}). \quad (101)$$

There are  $\sqrt{m}$  chunks, thus with probability at least  $1 - \sqrt{m} L^2 \exp(-\Omega(\log^2 m)) = 1 - L^2 \exp(-\Omega(\log^2 m))$ . (88) follows.  $\blacksquare$

**Proof of (89):**

For any  $a$ , we have,

$$z_{p,a+1} = D_{l+a+1} (W(I - Z_{p,a+1} Z_{p,a+1}^T) z_{p,a} + W Z_{p,a+1} Z_{p,a+1}^T z_{p,a}) \quad (102)$$

Thus,

$$\|z_{p,a+1} - D_{l+a+1} W(I - Z_{p,a+1} Z_{p,a+1}^T) z_{p,a}\| \leq \mathcal{O}(\frac{L^3 \sqrt{N} \log^3 m}{\sqrt{m}}) \quad (103)$$

We know that  $\frac{1}{m} \langle \text{Back}_l(x_i) \cdot D_l, \text{Back}_l(x_j) \cdot D_l \rangle = \sum_{i=1}^{m^{1/2}} \Theta_i$ , where

$$\begin{aligned} \Theta_i = \sum_{p \in [N_i]} \Xi_p &= \sum_p B^T (I - Z_{p,a} Z_{p,a}^T) D_{l+a} W(I - Z_{p,a} Z_{p,a}^T) \dots D_{l+1} W(I - Z_{p,1} Z_{p,1}^T) z_{p,0} \\ &\quad \cdot B^T (I - Z_{p,a} Z_{p,a}^T) D'_{l+a} W(I - Z_{p,a} Z_{p,a}^T) \dots D'_{l+1} W(I - Z_{p,1} Z_{p,1}^T) z'_{p,0} \\ &\quad \pm \mathcal{O}(m^{1/4} L^3 \log^4 m) \end{aligned} \quad (104)$$

Combine the facts :

- With probability at least  $1 - \exp(-\Omega(\log^2 m))$ ,

$$\sum_p B^T z_{p,a} \cdot B^T z'_{p,a} = \langle z_{p,a}, z'_{p,a} \rangle \pm \mathcal{O}(\frac{\sqrt{N} L^2 \log^2 m}{\sqrt{m}}). \quad (105)$$

• Let

$$\begin{aligned} D_l &= \phi(\mathbf{W}h_{l-1}(x_l) + \mathbf{A}X_l) \\ \widetilde{D}_l &= \phi(\mathbf{W}\widetilde{h}_{l-1}(x_l) + \mathbf{A}X_l) \end{aligned} \quad (106)$$

where  $\widetilde{h}$  is  $h_l$  define by re-randomization in Lemma 17. Then  $|\langle D'_l, D_l \rangle - \langle \widetilde{D}'_l, \widetilde{D}_l \rangle| \leq \mathcal{O}(\frac{L^2 \log^2 m}{m})$

•

$$\|Z_{p,a}^T z_{p,a}\| \leq \mathcal{O}(\frac{L^3 \sqrt{N} \log^3 m}{\sqrt{m}}). \quad (107)$$

and Claim F.1. Let  $Q_l = \sqrt{(1 + \frac{1}{L^3} \sum_{k=1}^l \|X_k\|^2) \cdot (1 + \frac{1}{L^3} \sum_{k=1}^l \|X'_k\|^2)}$ . With probability at least  $1 - \exp(-\Omega(\log^2 m))$ , we have

$$\begin{aligned} \langle z_{p,a}, z'_{p,a} \rangle &= \langle (I - Z_{p,a-1} Z_{p,a-1}^T) z_{p,a-1}, (I - Z_{p,a-1} Z_{p,a-1}^T) z'_{p,a-1} \rangle \\ &\quad \cdot \Sigma(\{h_{l+a-1}^T h'_{l+a-1} + \frac{1}{L^3} X_{l+a}^T X'_{l+a}\} / Q_{l+a}) \pm \mathcal{O}(\frac{L^3 \sqrt{N} \log^3 m}{\sqrt{m}}), \\ &= \langle \langle z_{p,a-1}, z'_{p,a-1} \rangle \cdot \Sigma(\langle h_{l+a-1}, h'_{l+a-1} \rangle / Q_{l+a} \\ &\quad + \frac{1}{L^3} \langle X_{l+a}, X'_{l+a} \rangle / Q_{l+a}) \pm \mathcal{O}(\frac{L^3 \sqrt{N} \log^3 m}{\sqrt{m}}), \end{aligned} \quad (108)$$

where

$$\Sigma(x) = \frac{1}{2} + \frac{\arcsin(x)}{\pi} = \frac{\pi - \arccos(x)}{\pi}. \quad (109)$$

In order to study the constant term in

$$\Sigma(\langle h_{l+a-1}, h'_{l+a-1} \rangle / Q_{l+a} + \frac{1}{L^3} \langle X_{l+a}, X'_{l+a} \rangle / Q_{l+a}),$$

we need to study  $\langle h_{l+a-1}, h'_{l+a-1} \rangle$ .

The constant term in  $\langle h_{l+a-1}, h'_{l+a-1} \rangle / Q_{l+a}$  is the sequence (Lemma 18):

$$\begin{aligned} K_l &= \Gamma(K_{l-1} \cdot Q_{l-1} / Q_l), \\ \Gamma(x) &= x + \frac{\sqrt{1-x^2} - \arccos(x)x}{\pi}. \end{aligned} \quad (110)$$

Note that  $K_l > 0$  is convergent. Meanwhile, the sequence  $K'_l$ ,

$$\begin{aligned} 0 &< K'_1 < 1, \\ K'_l &= \Gamma(K'_{l-1}), \end{aligned} \quad (111)$$

is also convergent Huang et al. (2020). We have  $\lim_{l \rightarrow \infty} K'_l = \lim_{l \rightarrow \infty} K_l = 1$ . The aim of us is to show  $\sum_{l=1}^L \sqrt{(1-K_l)} \leq \mathcal{O}(\log L)$ .

Let  $e_l = 1 - K_l$ . Claim F.3 and F.2 below show that  $e_l \sim \frac{1}{l^2}$  and

$$\text{The constant term in } \left\{ \prod_{l=1}^L \Sigma(\langle h_{l-1}, h'_{l-1} \rangle / Q_l + \frac{1}{L^3} \langle X_l, X'_l \rangle / Q_l) \right\} \geq \Omega(1/L^b). \quad (112)$$

and in this case,  $b = 3 + \frac{\log^2 L}{L} \leq 4$ . Then (89) follows.  $\blacksquare$

**Claim F.1** Let  $D$  and  $D'$  be diagonal matrix satisfying

$$\begin{aligned} (D)_{k,k} &= \mathbb{1}\{\mathbf{W}Y + \mathbf{A}X > 0\}, \\ (D')_{k,k} &= \mathbb{1}\{\mathbf{W}Y' + \mathbf{A}X' > 0\}. \end{aligned} \quad (113)$$

If  $\langle Y, Z \rangle, \langle Y, Z' \rangle = 0$ ,

$$\begin{aligned} \mathbb{E}_{\mathbf{W}, \mathbf{A}} \langle D \mathbf{W} Z, D' \mathbf{W} Z' \rangle &= Z^T Z' \cdot \mathbb{E}_{w \sim N(0, I_m), a \sim N(0, \frac{1}{L^3} I_d)} \langle \phi'([w, a]^T [Y, X]), \phi'([w, a]^T [Y', X']) \rangle \\ &= Z^T Z' \cdot \Sigma(\{Y^T Y' + X^T X'\} / (\|Y\| \cdot \|Y'\| + \|X\| \cdot \|X'\|)) \end{aligned} \quad (114)$$

with  $\phi'(x) = \sqrt{2} \mathbb{1}\{x > 0\}$ .

**Proof of Claim F.1:**

In fact,

$$\begin{aligned} \mathbb{E}_{\mathbf{W}, \mathbf{A}} \langle D\mathbf{W}Z, D'\mathbf{W}Z' \rangle &= \langle Z', \nabla_{Y'} \langle Z, \nabla_Y \mathbb{E}_{w \sim N(0, I_m), a \sim N(0, \frac{1}{L^3} I_d)} \rangle \rangle \\ &= \langle \phi([w, a]^T [Y, X]), \phi([w, a]^T [Y', X']) \rangle \end{aligned} \quad (115)$$

with  $\phi(x) = \sqrt{2} \max(0, x)$ . Then (114) is clearly a corollary of (115) and  $\langle Y, Z \rangle, \langle Y, Z' \rangle = 0$ .

**Claim F.2** Supposing  $K_l \sim \cos[\pi(1 - (\frac{l}{l+1})^b)] + \xi_l$ ,  $\sum_{l=l_1}^L \sqrt{\xi_l} \leq \mathcal{O}(1)$ ,  $b > 0$ ,

$$\prod_{l=1}^L \frac{\pi - \arccos(K_l)}{\pi} \geq \Omega(\exp(-b \log L)) \geq \Omega(L^{-b}) \quad (116)$$

**Proof:** We use the inequality,

$$\prod_{l=1}^L (1 - \frac{b}{l} - \Omega(\sqrt{\xi_l})) \geq \Omega(\exp(-\sum_{l=1}^L \frac{b}{l} - \Omega(\sqrt{\xi_l}))). \quad (117)$$

Meanwhile, for harmonic series,

$$\sum_{l=1}^L \frac{b}{l} = b \log L + b\gamma + \mathcal{O}(1/L^2) \quad (118)$$

where  $\gamma \approx 0.57721$  is the Euler- Mascheroni constant. Thus the claim follows.  $\blacksquare$

**Claim F.3** Let  $e_l$  satisfy

$$\begin{aligned} e_l &= \frac{Q_{l-1}}{Q_l} e_{l-1} + \frac{Q_l - Q_{l-1}}{Q_l} \\ &\quad - \frac{\sqrt{1 - (1 - \frac{Q_{l-1}}{Q_l} e_{l-1} - \frac{Q_l - Q_{l-1}}{Q_l})^2} - \arccos(\frac{Q_{l-1}}{Q_l} e_{l-1} + \frac{Q_l - Q_{l-1}}{Q_l})(1 - \frac{Q_{l-1}}{Q_l} e_{l-1} - \frac{Q_l - Q_{l-1}}{Q_l})}{\pi}. \end{aligned} \quad (119)$$

For  $l, L$  large enough, we have  $e_l \leq 1 - \cos[\pi(1 - (\frac{l}{l+1})^{3+\frac{\log^2 L}{L}})] + \xi_l$  and  $\sum_{l=l_1}^L \sqrt{\xi_l} \leq \mathcal{O}(1)$ .

Before proving this claim, we cite the following lemma in the proof of Lemma 15 in Huang et al. (2020):

**Lemma 20** Let

$$z_l = 1 - \cos[\pi(1 - (\frac{l}{l+1})^{3+\frac{\log^2 L}{L}})]. \quad (120)$$

$$z_l \geq z_{l-1} - \frac{\sqrt{1 - (1 - z_{l-1})^2} - \arccos(z_{l-1})(1 - z_{l-1})}{\pi} + \frac{3\pi^2 \log^2 L}{l^3 L} + \frac{20\pi^2}{2l^4} \quad (121)$$

**Proof of Claim F.3:** Firstly, note that from the assumption of  $\|X_l\|$ , we have

$$\frac{Q_l - Q_{l-1}}{Q_l} \leq \mathcal{O}(\frac{1}{L^3}).$$

We will show there exists  $q_l = z_l + \xi_l$  such that

$$\begin{aligned} q_l &\geq \frac{Q_{l-1}}{Q_l} q_{l-1} + \frac{Q_l - Q_{l-1}}{Q_l} \\ &\quad - \frac{\sqrt{1 - (1 - \frac{Q_{l-1}}{Q_l} q_{l-1} - \frac{Q_l - Q_{l-1}}{Q_l})^2} - \arccos(\frac{Q_{l-1}}{Q_l} q_{l-1} + \frac{Q_l - Q_{l-1}}{Q_l})(1 - \frac{Q_{l-1}}{Q_l} q_{l-1} - \frac{Q_l - Q_{l-1}}{Q_l})}{\pi}. \end{aligned} \quad (122)$$

Then  $e_l \leq q_l$ . The theorem follows.

Let

$$\begin{aligned}
\frac{Q_l - Q_{l-1}}{Q_l} &= \epsilon_l z_{l-1}, \\
q_{l-1} &= (1 + \theta_l) z_{l-1}, \\
(1 + \theta_{l+1}) &= \frac{Q_l - Q_{l-1}}{Q_l} (1 + \theta_l) + \epsilon_l, \\
\theta_{l_0+1} &= 0.
\end{aligned} \tag{123}$$

Since  $z_l < 1$ ,  $\theta_l > 0$ . And

$$\frac{Q_{l-1}}{Q_l} q_{l-1} + \frac{Q_l - Q_{l-1}}{Q_l} = \left( \frac{Q_l - Q_{l-1}}{Q_l} (1 + \theta_l) + \epsilon_l \right) z_{l-1} = (1 + \theta_{l+1}) z_{l-1}.$$

Using Lemma 20, since  $\frac{\sqrt{1-z^2} - \arccos(z)(1-z)}{\pi} \sim O(z^{3/2})$ , we claim that

$$\begin{aligned}
(1 + \theta_{l+1}) z_l &\geq (1 + \theta_{l+1}) z_{l-1} \\
&\quad - \frac{\sqrt{1 - (1 - (1 + \theta_l) z_{l-1})^2} - \arccos((1 + \theta_l) z_{l-1})(1 - (1 + \theta_l) z_{l-1})}{\pi}
\end{aligned} \tag{124}$$

This is because  $\theta_l > 0$ ,  $(1 + \theta_l)^{3/2} \geq (1 + \theta_{l+1})$ . Then we have

$$\begin{aligned}
&\quad - \frac{\sqrt{1 - (1 - \frac{Q_{l-1}}{Q_l} q_{l-1} - \frac{Q_l - Q_{l-1}}{Q_l})^2} - \arccos(\frac{Q_{l-1}}{Q_l} q_{l-1} + \frac{Q_l - Q_{l-1}}{Q_l})(1 - \frac{Q_{l-1}}{Q_l} q_{l-1} - \frac{Q_l - Q_{l-1}}{Q_l})}{\pi} \\
&\leq (1 + \theta_{l+1})(z_l - z_{l-1}).
\end{aligned} \tag{125}$$

Therefore,

$$\begin{aligned}
&\frac{Q_{l-1}}{Q_l} q_{l-1} + \frac{Q_l - Q_{l-1}}{Q_l} - \\
&\quad \frac{\sqrt{1 - (1 - \frac{Q_{l-1}}{Q_l} q_{l-1} - \frac{Q_l - Q_{l-1}}{Q_l})^2} - \arccos(\frac{Q_{l-1}}{Q_l} q_{l-1} + \frac{Q_l - Q_{l-1}}{Q_l})(1 - \frac{Q_{l-1}}{Q_l} q_{l-1} - \frac{Q_l - Q_{l-1}}{Q_l})}{\pi} \\
&\leq \left[ \frac{Q_l - Q_{l-1}}{Q_l} \right] (1 + \theta_l) z_{l-1} + \epsilon_l z_{l-1} + (1 + \theta_{l+1}) z_l - (1 + \theta_{l+1}) z_{l-1} \\
&= \left[ \frac{Q_l - Q_{l-1}}{Q_l} (1 + \theta_l) + \epsilon_l - (1 + \theta_{l+1}) \right] z_{l-1} + [1 + \theta_{l+1}] z_l \\
&= [1 + \theta_{l+1}] z_l \\
&= q_l.
\end{aligned} \tag{126}$$

Since

$$(1 + \theta_{l+1}) = \frac{Q_l - Q_{l-1}}{Q_l} (1 + \theta_l) + \epsilon_l, \tag{127}$$

we can write

$$(1 + \theta_{l+1}) = 1 + \sum_{l'=l_0}^l \prod_{j=l'}^l \frac{Q_j - Q_{j-1}}{Q_j} \epsilon_{l'}. \tag{128}$$

Then

$$(1 + \theta_{l+1}) \leq 1 + \mathcal{O}\left(\sum_{l'=l_0}^l \epsilon_{l'}\right) \tag{129}$$

$$\begin{aligned}
q_l &= (1 + \theta_{l+1}) z_l \leq z_l + \mathcal{O}\left(\sum_{l'=l_0}^l \epsilon_{l'} z_l\right) \\
&\leq z_l + \mathcal{O}\left(\sum_{l'=l_0}^l \frac{Q_{l'} - Q_{l'-1}}{Q_{l'}} \frac{(l')^2}{l^2}\right) \\
&\leq z_l + \mathcal{O}\left(\frac{l}{L^3}\right)
\end{aligned} \tag{130}$$

Since

$$\sum_{l=1}^L \sqrt{\frac{l}{L^3}} \leq \mathcal{O}(1), \quad (131)$$

the theorem follows. ■

## G Complexity of Functions: Proof of Theorem 4.

In this section, we give the detailed proof of Theorem 4.

**Lemma 21** *Let*

$$\Sigma(x) = \frac{1}{2} + \frac{\arcsin(x)}{\pi}. \quad (132)$$

*If  $\|Z_i\|, \|Z_j\| \leq \mathcal{O}(1)$ ,  $\mu > 1$ ,*

$$\Sigma(\{\mu + \frac{1}{L^3} Z_i^T Z_j\}/Q_l) \succeq \Omega(\frac{1}{L^3}) \cdot (\frac{1}{\mathcal{O}(L)})^k \cdot \frac{1}{k^2} (Z_i^T Z_j)^k / (\|Z_i\| \cdot \|Z_j\|)^k \quad (133)$$

**Proof:** From the Taylor formula, for all  $p \in \mathbb{N}$ ,

$$\Sigma(Z_i^T Z_j) \succeq \sum_{p=1}^{\infty} \frac{(Z_i^T Z_j)^{2p-1}}{2\pi(2p-1)^2}. \quad (134)$$

And

$$\Sigma([\mu + \frac{1}{L^3} Z_i^T Z_j]/Q_l) \succeq \sum_{p=1}^{\infty} \frac{(\mu + \frac{1}{L^3} Z_i^T Z_j)^{2p-1}}{2\pi(2p-1)^2 \cdot Q_l^{2p-1}}. \quad (135)$$

For any  $k \in \mathbb{N}$ , the coefficient of  $[Z_i^T Z_j/L^3]^k$  in  $\Sigma([\mu_0 + \frac{1}{L^3} Z_i^T Z_j]/Q_l)$  will be larger than  $\frac{a_k}{Q_l^k}$  with

$$a_k = \sum_{2p-1 > k}^{\infty} \frac{1}{2\pi(2p-1)^2} \cdot (\frac{\mu}{Q_l})^{2p-1-k} \cdot \frac{2p-1 \cdot (2p-2) \cdot \dots \cdot (2p-k)}{k!} \quad (136)$$

Consider

$$b_k = \sum_{2p-1 > k}^{\infty} (\frac{\mu}{Q_l})^{(2p-1-k-2)} \cdot \frac{2p-1 \cdot (2p-2) \cdot \dots \cdot (2p-k+2)}{k!} \quad (137)$$

$b_k = \Omega((\frac{\mu}{Q_l})^2) \cdot a_k$ . Let

$$f(x) = \frac{1}{1-x^2}. \quad (138)$$

Then

$$\begin{aligned} b_k &\geq \Omega(|f^{(k-2)}(\frac{\mu}{Q_l})|) \cdot \frac{1}{k!} \\ &= \frac{(k-2)!}{2 \cdot k!} \left[ \frac{1}{(1-\frac{\mu}{Q_l})^{k-1}} + \frac{(-1)^{k-2}}{(1+\frac{\mu}{Q_l})^{k-1}} \right] \\ &\geq \Omega\left(\frac{1}{(k-2) \cdot (k-3)} \cdot \frac{Q_l^{k-1}}{(Q_l - \mu)^{k-1}}\right) \end{aligned} \quad (139)$$

Thus the coefficient of  $(Z_i^T Z_j/L^3)^k$  in  $\Sigma([\mu_0 + Z_i^T Z_j]/Q_l)$  will be larger than

$$\Omega\left(\frac{1}{(k-2) \cdot (k-3)} \cdot \frac{Q_l^{-1}}{(Q_l - \mu)^{k-1}} \frac{Q_l^2}{\mu^2}\right) \geq \Omega(Q_l - \mu) \cdot \frac{1}{(Q_l - \mu)^k \cdot k^2}.$$

Since

$$\begin{aligned} 0 &< C_1 \leq \|X_{l,i}\|^2, \|X_{l,j}\|^2 \leq C_2, \\ \|Z_i\|^2 / \sum_{l=1}^L \|X_{i,l}\|^2 &\sim \frac{1}{L}, \\ \|Z_j\|^2 / \sum_{l=1}^L \|X_{j,l}\|^2 &\sim \frac{1}{L} \end{aligned} \quad (140)$$

and

$$Q_l = \sqrt{\left(1 + \frac{1}{L^3} \sum_{k=1}^l \|X_{i,k}\|^2\right) \cdot \left(1 + \frac{1}{L^3} \sum_{k=1}^l \|X_{j,k}\|^2\right)}. \quad (141)$$

We have

$$\Sigma(\{\mu + \frac{1}{L^3} Z_i^T Z_j\}/Q_l) \succeq \Omega(\frac{1}{L^3}) \cdot (\frac{1}{\mathcal{O}(L)})^k \cdot \frac{1}{k^2} (Z_i^T Z_j)^k / (\|Z_i\| \cdot \|Z_j\|)^k. \quad (142)$$

The claim follows.  $\blacksquare$

Using this lemma, note that we can write  $[K_{i,j}^{l-1} + \frac{1}{L^3} X_{i,l}^T X_{j,l}]/Q_l = \frac{\mu + \frac{1}{L^3} X_{i,l}^T X_{j,l} + T_{i,j}}{Q_l}$  with  $T_{i,j} \geq 0$  where  $\mu = 1$  is the constant term in  $K_{i,j}^{l-1}$  and

$$[K_{i,j}^{l-1} + \frac{1}{L^3} X_{i,l}^T X_{j,l} + T_{i,j}]/Q_l \succeq \frac{\mu + \frac{1}{L^3} X_{i,l}^T X_{j,l}}{Q_l}.$$

We have the following lemma:

**Lemma 22** *Under the condition of Lemma 18, for any  $k \in \mathbb{N}$ ,*

$$\Sigma(\{K_{i,j}^l + \frac{1}{L^3} X_{i,l}^T X_{j,l}\}/Q_l) \succeq \Omega(\frac{1}{L^3}) \cdot (\frac{1}{\mathcal{O}(L)})^k \cdot \frac{1}{k^2} (X_{i,l}^T X_{j,l})^k / (\|X_{i,l}\| \cdot \|X_{j,l}\|)^k. \quad (143)$$

Now we can prove Theorem 4.

**Theorem 23** *Assume there is  $\delta \in [0, e^{-1}]$ . Let  $n$  samples in  $\mathcal{D}$  be  $\{x_i, y_i\}_{i=1}^n$ .  $\tilde{y} = [F^*(x_1), F^*(x_2), \dots, F^*(x_n)]^T$ .  $F^*$  is a function belonging to the concept class (9) or (11) such that  $y_i \cdot F^*(x_i) \geq 1$  for all  $i$ . There exists matrix  $\mathbf{H}^\infty$  satisfying:*

$$\mathbf{H} + \epsilon^T \epsilon \succeq \mathbf{H}^\infty \text{ with } \|\epsilon\|_F \leq 0.01/\mathcal{O}(\mathcal{C}^*) \quad (144)$$

and

$$\sqrt{\tilde{y}^T (\mathbf{H}^\infty)^{-1} \tilde{y}} \leq \mathcal{O}(\mathcal{C}^*). \quad (145)$$

**Proof:**

Firstly, using the forward and backward correlation Theorem 5 and Theorem 6,

$$\frac{1}{m} \langle \text{Back}_l(x_i) \cdot D_l, \text{Back}_l(x_j) \cdot D_l' \rangle \succeq \frac{1}{\mathcal{O}(L^4)} \Sigma(\{\frac{1}{L^3} \langle X_{i,l}, X_{j,l} \rangle + K_{i,j}^{l-1}\}/Q_l) \pm \mathcal{O}(\frac{L^4 \log^4 m}{m^{1/4}}) \quad (146)$$

and

$$|\frac{1}{m} \langle \text{Back}_l(x_i) \cdot D_l, \text{Back}_{l'}(x_j) \cdot D_{l'}' \rangle| \leq \mathcal{O}(\frac{L^4 \log^4 m}{m^{1/4}}). \quad (147)$$

for  $l \neq l'$ .

Thus

$$\begin{aligned} H_{i,j} &= \frac{1}{m} \langle \nabla f(\mathbf{W}, x_i), \nabla f(\mathbf{W}, x_j) \rangle = \sum_{l=1}^L \frac{1}{m} \langle \text{Back}_l^T D_l \cdot h_l^T(x_i), \text{Back}_l^T D_l \cdot h_l^T(x_j) \rangle \\ &\quad \pm \mathcal{O}(\frac{L^6 \log^4 m}{m^{1/4}}) \end{aligned} \quad (148)$$

The closure of multiplication Proposition 2.2 for positive definite function concludes there exists semi-positive definite matrix  $\mathbf{M}$

$$H_{i,j} + M_{i,j} \succeq \frac{1}{\mathcal{O}(L^4)} \Sigma(\{\frac{1}{L^3} \langle X_{i,l}, X_{j,l} \rangle + K_{i,j}^{l-1}\}/Q_l). \quad (149)$$

with  $M_{i,j} \leq \mathcal{O}(\frac{L^6 \log^2 m}{m^{1/4}})$ . Then  $\|\mathbf{M}\|_F \leq n^2 \frac{L^6 \log^2 m}{m^{1/4}}$ .  $\mathbf{M}$  is semi-positive define, therefore there exists  $\epsilon^T \epsilon = \mathbf{M}$ ,  $\|\epsilon\|_F \leq 0.01/\mathcal{C}^*$  by SVD and reshaping since  $m > \text{poly}(n, \mathcal{C}^*)$ . Meanwhile let

$$\mathbf{G} = m^{-1/2} \cdot (\text{vec}[\nabla f(\mathbf{W}^0, x_1)], \text{vec}[\nabla f(\mathbf{W}^0, x_2)], \dots, \text{vec}[\nabla f(\mathbf{W}^0, x_n)]) \in \mathbb{R}^{m^2 \times n}.$$

Since  $m^2 \gg n$ , we can set  $\epsilon$  satisfying  $\epsilon^T \mathbf{G} = 0$  without changing  $\epsilon^T \epsilon$ .

For a function  $\psi(\beta_{l,r}^T X_l / \|X_l\|) = \sum_{p=1}^{\infty} c_p (\beta_{l,r}^T X_l / \|X_l\|)^p$  with  $\|\beta_{l,r}\| \leq 1$ , let

$$y_p = [c_p (\beta_{l,r}^T X_{1,l} / \|X_{1,l}\|)^p, \dots, c_p (\beta_{l,r}^T X_{n,l} / \|X_{n,l}\|)^p] \in \mathbb{R}^n. \quad (150)$$

Using Proposition 2.4, if  $H_{i,j}^\infty \succeq \xi_p (X_{l,i}^T X_{l,j} / (\|X_{l,i}\| \cdot \|X_{l,j}\|))^p$ ,

$$y_p^T (\mathbf{H}^\infty)^{-1} y_p \leq \frac{c_p^2 \|\beta_{l,r}^T\|^{2p}}{\xi_p}.$$

In our case, from Lemma 22,

$$\xi_p = \Omega(\frac{1}{L^4}) \cdot \Omega(\frac{1}{L^3}) \cdot (\frac{1}{\mathcal{O}(L)})^p \cdot \frac{1}{p^2} \quad (151)$$

Note that

$$y \stackrel{\text{def}}{=} \sum_{p=1}^{\infty} y_p = [\psi(\beta_{l,r}^T X_{1,l} / \|X_{1,l}\|), \dots, \psi(\beta_{l,r}^T X_{n,l} / \|X_{n,l}\|)] \in \mathbb{R}^n.$$

We have

$$\sqrt{y^T (\mathbf{H}^\infty)^{-1} y} \leq \sum_p \sqrt{y_p^T (\mathbf{H}^\infty)^{-1} y_p} \leq \sum_{p=1}^{\infty} \frac{c_p \|\beta_{l,r}^T\|^p}{\xi_p}. \quad (152)$$

In our case ,

$$\frac{1}{\sqrt{\xi_p}} \leq \mathcal{O}(L^{3.5}) \cdot (\mathcal{O}(\sqrt{L}))^p \cdot p. \quad (153)$$

We have

$$\sqrt{\tilde{y}^T (\mathbf{H}^\infty)^{-1} \tilde{y}} \leq \mathcal{O}(\mathcal{C}^*) \quad (154)$$

for Additive Concept Class (9).

For N-variables Concept Class (11)

$$F^*(x) = \sum_r \psi_r(\langle \beta_r, [X_{l_1}, \dots, X_{l_N}] \rangle / \sqrt{N} \max \|X_{l_n}\|).$$

We rewrite it as

$$F^*(x) = \sum_r \psi_r(\langle \beta_r, [X_{l_{\max}}, \dots, X_{l_{\max}-N'}] \rangle / \sqrt{N} \max \|X_{l_n}\|) \\ l_{\max} = \max(l_1, \dots, l_N), N' = \max(l_1, \dots, l_N) - \min(l_1, \dots, l_N).$$

Finally we prove that  $\sqrt{\tilde{y}^T (\mathbf{H}^\infty)^{-1} \tilde{y}} \leq \mathcal{O}(L^4 \sum_r \mathcal{C}_N(\psi_r, \mathcal{O}(\sqrt{L})))$ .

Based on the structure of  $H^\infty$ , we have

$$H_{i,j}^\infty \succeq \frac{1}{\mathcal{O}(L^4)} \cdot \Sigma(\{K_{i,j}^{l_1} + \frac{1}{L^3} X_{i,l_1}^T X_{j,l_1}\} / Q_{l_1}) \cdot \dots \cdot \Sigma(\{K_{i,j}^{l_N} + \frac{1}{L^3} X_{i,l_N}^T X_{j,l_N}\} / Q_{l_N}).$$

Then we have the follow claim

**Claim G.1** For any  $N$  terms  $X_{i,r_1}^T X_{j,r_1}, X_{i,r_2}^T X_{j,r_2}, \dots, X_{i,r_N}^T X_{j,r_N}$ ,  $r_{\max} = \max(r_1, \dots, r_N)$ , we have

$$H_{i,j}^\infty \succeq \frac{1}{C_1^N L^4 \cdot L^{2N} \cdot C_{N,p} \cdot (p/N)^{2N}} \\ \cdot (X_{i,r_1}^T X_{j,r_1} / \|X_{i,r_1}\| \cdot \|X_{j,r_1}\| + X_{i,r_2}^T X_{j,r_2} / \|X_{i,r_2}\| \cdot \|X_{j,r_2}\| \dots \\ + X_{i,r_N}^T X_{j,r_N} / \|X_{i,r_N}\| \cdot \|X_{j,r_N}\|)^p \\ \succeq \frac{1}{C_1^N L^4 \cdot L^{2N} \cdot C_{N,p} \cdot (p/N)^{2N}} \\ \cdot (X_{i,r_1}^T X_{j,r_1} + X_{i,r_2}^T X_{j,r_2} \dots + X_{i,r_N}^T X_{j,r_N})^p / (N \cdot \max_n (\|X_{i,r_n}\|) \cdot \max_n (\|X_{j,r_n}\|))^p \quad (155)$$

where  $C_1$  is a large constant.

which can be deduced from the following facts:

- (a) For  $k \in \mathbb{N}$ ,  $\Sigma(\{K_{i,j}^l + \frac{1}{L^3} X_{i,l}^T X_{j,l}\}/Q_l) \succeq \Omega(\frac{1}{L^3}) \cdot (\frac{1}{\mathcal{O}(L)})^k \cdot \frac{1}{k^2} (X_{i,l}^T X_{j,l})^k / (\|X_{i,l}\| \cdot \|X_{j,l}\|)^k$ .
  - (b) For any  $n$  integers  $n_1, n_2, \dots, n_N$ , with  $n_1 + n_2 + \dots + n_N = p$ ,  $C_{N,p} \geq \frac{p!}{n_1! n_2! \dots n_N!}$  and the largest coefficient of monomial in  $(x_1 + x_2 + \dots + x_N)^{2p-1}$  is less than  $C_{N,p}$ .
  - (c) For any  $n$  integers  $n_1, n_2, \dots, n_N$ , with  $n_1 + n_2 + \dots + n_N = p$ ,  $(p/N)^{2N} \geq n_1^2 \cdot \dots \cdot n_N^2$ .
- (b) and (c) are trivial. (a) is from Lemma 22.

Combing these results, polynomial theorem and using a similar argument as (154), we have

$$\sqrt{\tilde{y}^T (\mathbf{H}^\infty)^{-1} \tilde{y}} \leq L^2 \mathcal{O}(1 + \sum_{p=1}^{\infty} L^{1.5N} C_1^N \cdot \sqrt{C_{N,p}} \cdot (p/N)^N (\mathcal{O}(\sqrt{L}))^p \cdot |c_p|).$$

Thus  $\sqrt{\tilde{y}^T (\mathbf{H}^\infty)^{-1} \tilde{y}} \leq \mathcal{O}(L^2 \sum_r \mathcal{C}_N(\psi_r, 1))$ .

Finally we prove

$$\sqrt{\tilde{y}^T (\mathbf{H}^\infty)^{-1} \tilde{y}} \leq \mathcal{O}(L^3 \sum_r \mathcal{C}(\psi_r, 2^{l_0} \mathcal{O}(\sqrt{L}))).$$

Consider

$$\begin{aligned} K_{i,j}^1 &= Q_l \cdot \sum_{r=0}^{\infty} \mu_r^2 (1 + \frac{1}{L^3} X_{i,1}^T X_{j,1}/Q_l)^r, \\ K_{i,j}^l &= Q_l \sum_{r=0}^{\infty} \mu_r^2 (\{\frac{1}{L^3} X_{i,l}^T X_{j,l} + K_{i,j}^{l-1}\}/Q_l)^r. \end{aligned} \tag{156}$$

with  $\mu_r = \frac{1}{\sqrt{2\pi}} \int_0^\infty \sqrt{2x} h_r(x) e^{-\frac{x^2}{2}} dx$ ,  $h_r(x) = \frac{1}{\sqrt{r!}} (-1)^r e^{\frac{x^2}{2}} \frac{d^r}{dx^r} e^{-\frac{x^2}{2}}$ . We can rewrite this equation as:

$$\begin{aligned} \bar{K}_1 &= \sum_{r=0}^{\infty} \mu_r^2 (1 + \frac{1}{L^3} X_{i,1}^T X_{j,1}/Q_1)^r = \Gamma([1 + \frac{1}{L^3} X_{i,1}^T X_{j,1}]/Q_1), \\ \bar{K}_l &= \Gamma(\bar{K}_{l-1} \cdot Q_{l-1}/Q_l), \\ \Gamma(x) &= x + \frac{\sqrt{1-x^2} - \arccos(x)x}{\pi}. \end{aligned} \tag{157}$$

and

$$\begin{aligned} K_{i,j}^l &= \bar{K}_l \cdot Q_l \\ &= Q_l \cdot \underbrace{\Gamma\left(\frac{Q_{l-1}}{Q_l}\right) \circ \dots \circ \Gamma\left\{\frac{1}{Q_1} \cdot \left(1 + \frac{1}{L^3} X_{i,1}^T X_{j,1}\right)\right\}}_{l \text{ times}}. \end{aligned} \tag{158}$$

Using the fact

$$Q_l \cdot \prod_{k=k_0}^l \frac{Q_{k-1}}{Q_k} = Q_{k_0-1}, \tag{159}$$

and

$$\nabla_x f_l \circ f_{l-1} \dots \circ f_1(x) = f'_l \circ f'_{l-1} \dots \circ f'_1(x),$$

The linear part in  $K_{i,j}^l$  is  $\sum_{r=0}^{l-1} \mu_1^{2l-2r} \frac{1}{L^3} X_{i,r}^T X_{j,r}$ . Thus

$$\begin{aligned} &K_{i,j}^l + \frac{1}{L^3} X_{i,l}^T X_{j,l} \\ &\succeq \frac{1}{L^3} X_{i,l}^T X_{j,l} + \sum_{r=0}^{l-1} \mu_1^{2l-2r} \frac{1}{L^3} X_{i,r}^T X_{j,r} \\ &\succeq \mu_1^{2l} \sum_{r=1}^l \frac{1}{L^3} X_{i,r}^T X_{j,r} \end{aligned} \tag{160}$$

with  $\mu_1^2 = \frac{1}{2}$ .

$\|\mu_1^{2l} \sum_{r=1}^l X_{i,r}^T X_{j,r}\| \leq \mu_1^{2l} \cdot l \leq \mathcal{O}(1)$ . Then from Lemma 21, we have

$$H_{i,j}^\infty \succeq \Omega\left(\frac{1}{L^7}\right) \cdot \left(\frac{1}{\mathcal{O}(L)}\right)^k \cdot \frac{1}{k^2} (Z_i^T Z_j)^k / (\|Z_i\| \cdot \|Z_j\| \cdot 2^l)^k \quad (161)$$

with  $Z_i^T Z_j = \sum_{r=1}^l \mu_1^{2r} X_{i,r}^T X_{j,r}$  and  $\|Z_i\|^2 = \sum_r \mu_1^{2r} \|X_{i,r}\|^2$

Therefore

$$\sqrt{\tilde{y}^T (\mathbf{H}^\infty)^{-1} \tilde{y}} \leq \mathcal{O}(L^{3.5} \sum_r \mathcal{C}(\psi_r, 2^{l_0} \mathcal{O}(\sqrt{L})))$$

The theorem follows.  $\blacksquare$

**Remark G.1** Based on the previous results, we can generalize the results to the loss with the form:

$$\frac{1}{n} \sum_{i=1}^n \sum_{l=1}^L \ell(y_i \cdot f_l(\mathbf{W}, x_i))$$

with  $f_l(\mathbf{W}, x) = \mathbf{B}^T h_l(x)$  to show for  $\mathbf{H}_{i,j}^l = \langle \nabla f_l(\mathbf{W}, x_i), \nabla f_l(\mathbf{W}, x_j) \rangle$ , there exists

$$\mathbf{H}^l + \epsilon^T \epsilon \succeq (\mathbf{H}^l)^\infty \text{ with } \|\epsilon\|_F \leq 0.01 / \sqrt{\tilde{y}^T ((\mathbf{H}^l)^\infty)^{-1} \tilde{y}} \quad (162)$$

In fact we have following two generalization results of previous results which are in fact already contained in the proof.

*Generalization of Lemma 17:*

Let  $g_l = \phi_1(\mathbf{W} g_{l-1})$ ,  $h_l(x_1) = \phi_2(\mathbf{W} h_{l-1}(x_1) + \mathbf{A} X_l)$ .  $\tilde{g}_l = \phi_1(\tilde{\mathbf{W}} \tilde{g}_{l-1})$  and  $\tilde{h}_l(x_1) = \phi_1(\tilde{\mathbf{W}} \tilde{h}_{l-1}(x_1) + \tilde{\mathbf{A}} X_l)$  are defined by  $\tilde{\mathbf{W}}, \tilde{\mathbf{A}}, \tilde{\mathbf{W}}, \tilde{\mathbf{A}}$  and  $\mathbf{W}, \mathbf{A}$  are i.i.d. Then for any  $0 < l, l' < L$ , with probability at least  $1 - L^2 \exp(-\Omega(\log^2 m))$ ,

$$|g_l^T h_{l'}(x') - \bar{g}_l^T \bar{h}_{l'}(x')| \leq \mathcal{O}(L^2 \log^2 m / m) \quad (163)$$

where

$$\begin{aligned} \bar{g}_l &= \phi_1(\mathbf{W} \tilde{g}_{l-1}) \\ \bar{h}_{l'}(x_1) &= \phi_2(\mathbf{W} \tilde{h}_{l'-1}(x_1) + \mathbf{A} X_l) \end{aligned}$$

Let  $\phi_1(x) = x$ ,  $\phi_2(x) = \max(x, 0)$ . One corollary of this result is that from (4.2) in Allen-Zhu et al. (2019c), there exists  $g_l$ , such that  $\langle g_l, h_{l'} \rangle \geq 1/\text{poly}(L)$  when  $l = l'$ . Else  $\langle g_l, h_{l'} \rangle = 0$ .

*Generalization of Theorem 19:*

With probability at least  $1 - L^2 \exp(-\Omega(\log^2 m))$ ,

$$\left| \frac{1}{m} \langle B D_{l_1} W \cdots D_{l_{l+1}} W D_l, B D_{l'_2} W \cdots D_{l'_{l+1}} W D_{l'} \rangle \right| \leq \mathcal{O}\left(\frac{L^4 \log^4 m}{m^{1/4}}\right). \quad (164)$$

if  $l_1 \neq l_2$ .

Then we can show there exists  $w_a^*$  with  $\|w_a^*\| \leq \mathcal{C}(F_a^*)$ . for  $a = 1, 2 \dots L$  with

$$\frac{1}{\sqrt{m}} \langle \nabla_{\tilde{\mathbf{W}}} f_a(\tilde{\mathbf{W}}, x_i), w_a^* \rangle = \frac{1}{m} \sum_l \langle B D_a W \cdots D_{l+1} W D_l, w_{a, \text{back}}^* \rangle \cdot \langle h_l(x_i), g_a \rangle = F_a^*(x_i) + \epsilon \quad (165)$$

and

$$\left| \frac{1}{\sqrt{m}} \langle \nabla_{\tilde{\mathbf{W}}} f_{a'}(\tilde{\mathbf{W}}, x_i), w_a^* \rangle \right| = \left| \frac{1}{m} \sum_l \langle B D_{a'} W \cdots D_{l+1} W D_l, w_{a, \text{back}}^* \rangle \cdot \langle h_l(x_i), g_a \rangle \right| \leq \epsilon \quad (166)$$

when  $a \neq a'$ .

Here  $w_{a, \text{back}}^*$  is from the SVD of matrix

$$\frac{1}{m} \langle B D_{l_1} W \cdots D_{l_{l+1}} W D_l, B D_{l'_2} W \cdots D_{l'_{l+1}} W D_{l'} \rangle.$$

as (65) in the proof of Lemma 15.
